# Supplementary material
Source: PubMed Central journal article supplement (PMC8092305)
Supplement: mBio.03509-20-sf001.pdf [file mBio.03509-20-sf001.pdf]

**(a)**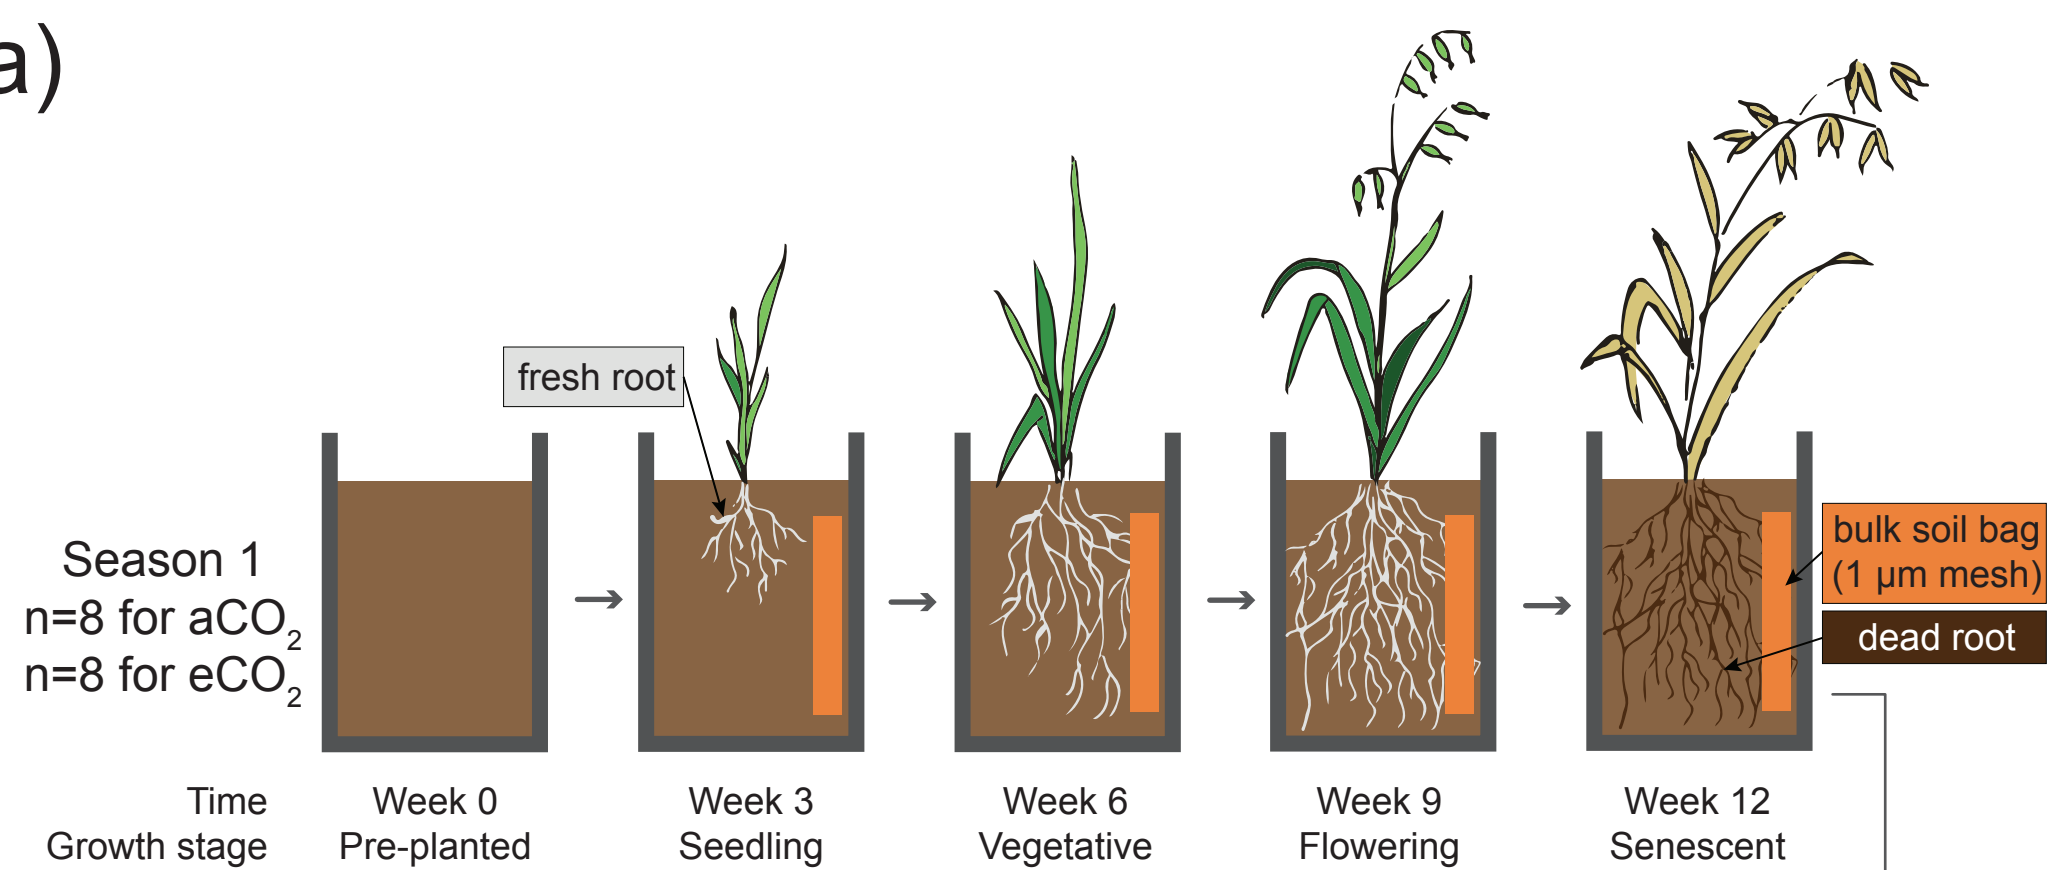

dead shoots removed, followed by 3 months dry season

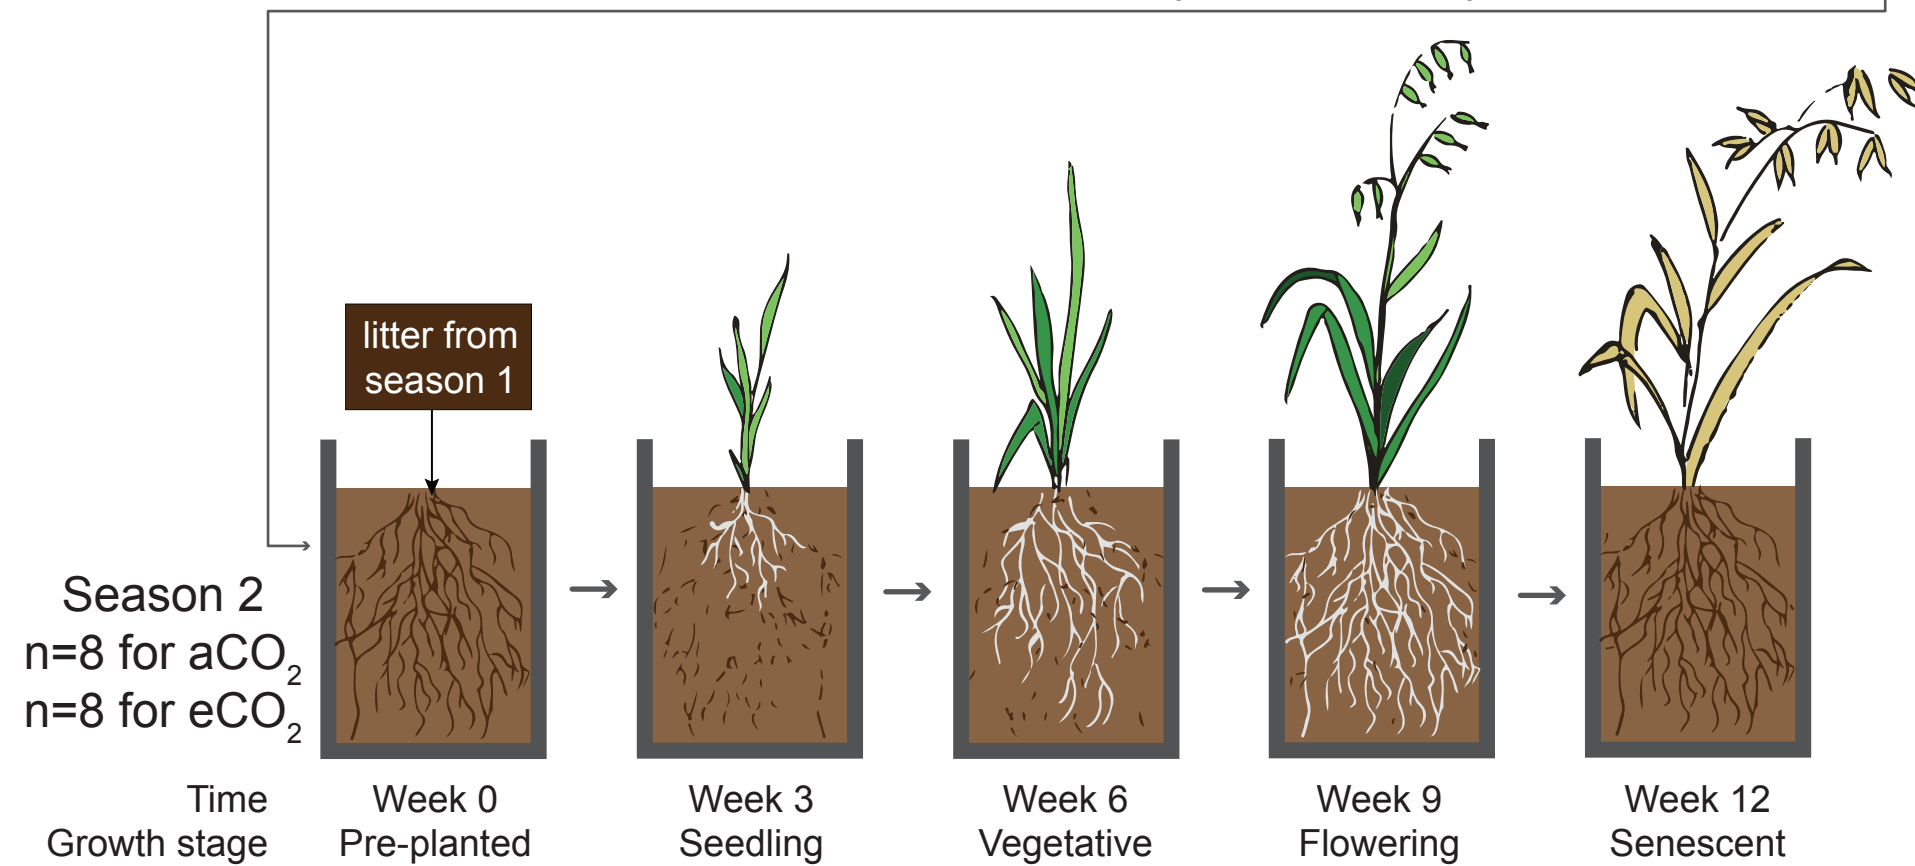**(b)**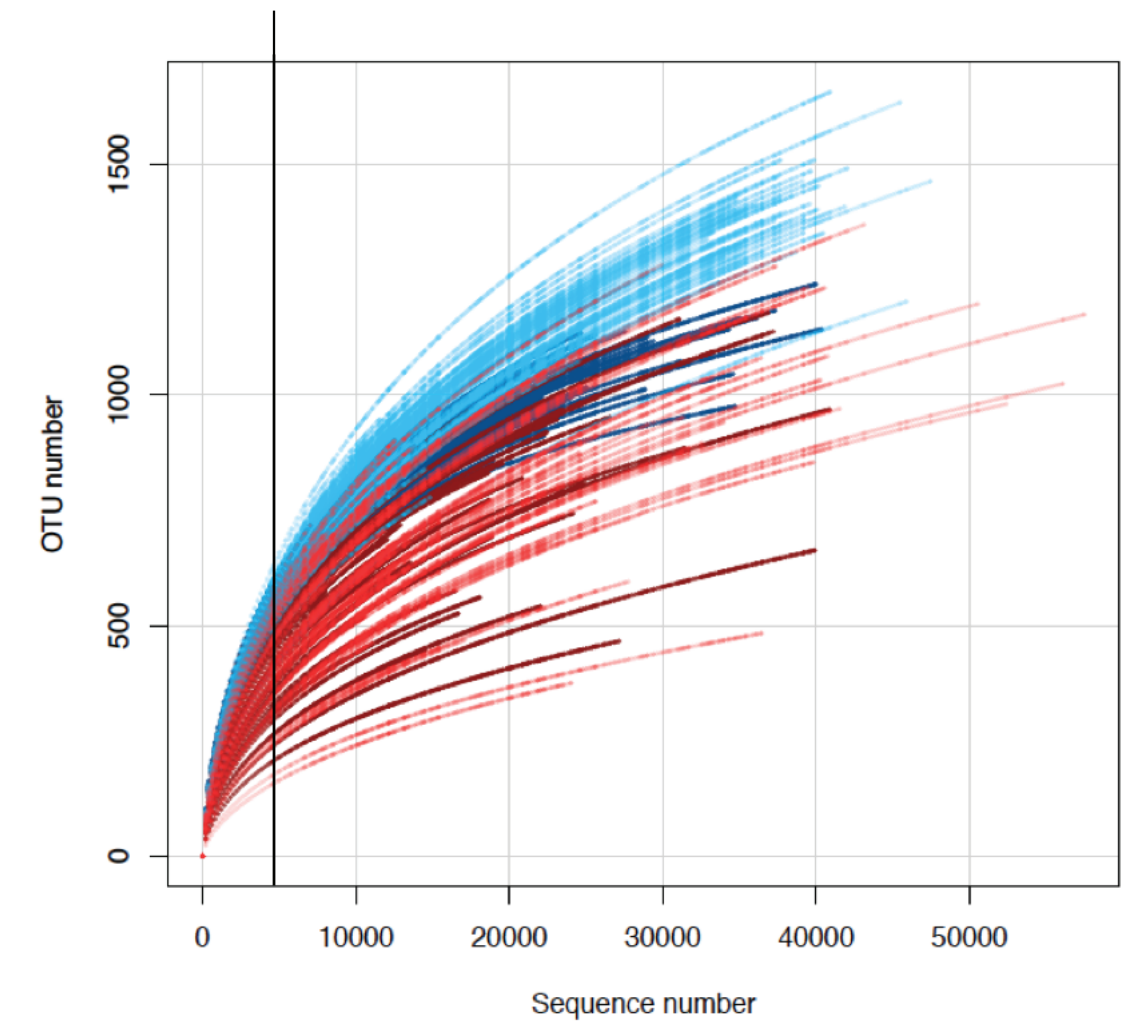

- Season 1, bulk
- Season 1, rhizosphere
- Season 2, bulk + litter
- Season 2, rhizosphere + litter
