# Supplementary material
Source: PubMed Central journal article supplement (PMC8092305)

(a)

Aggregated abundance of four OTUs  
(175932, 42846, 61972 and 64784)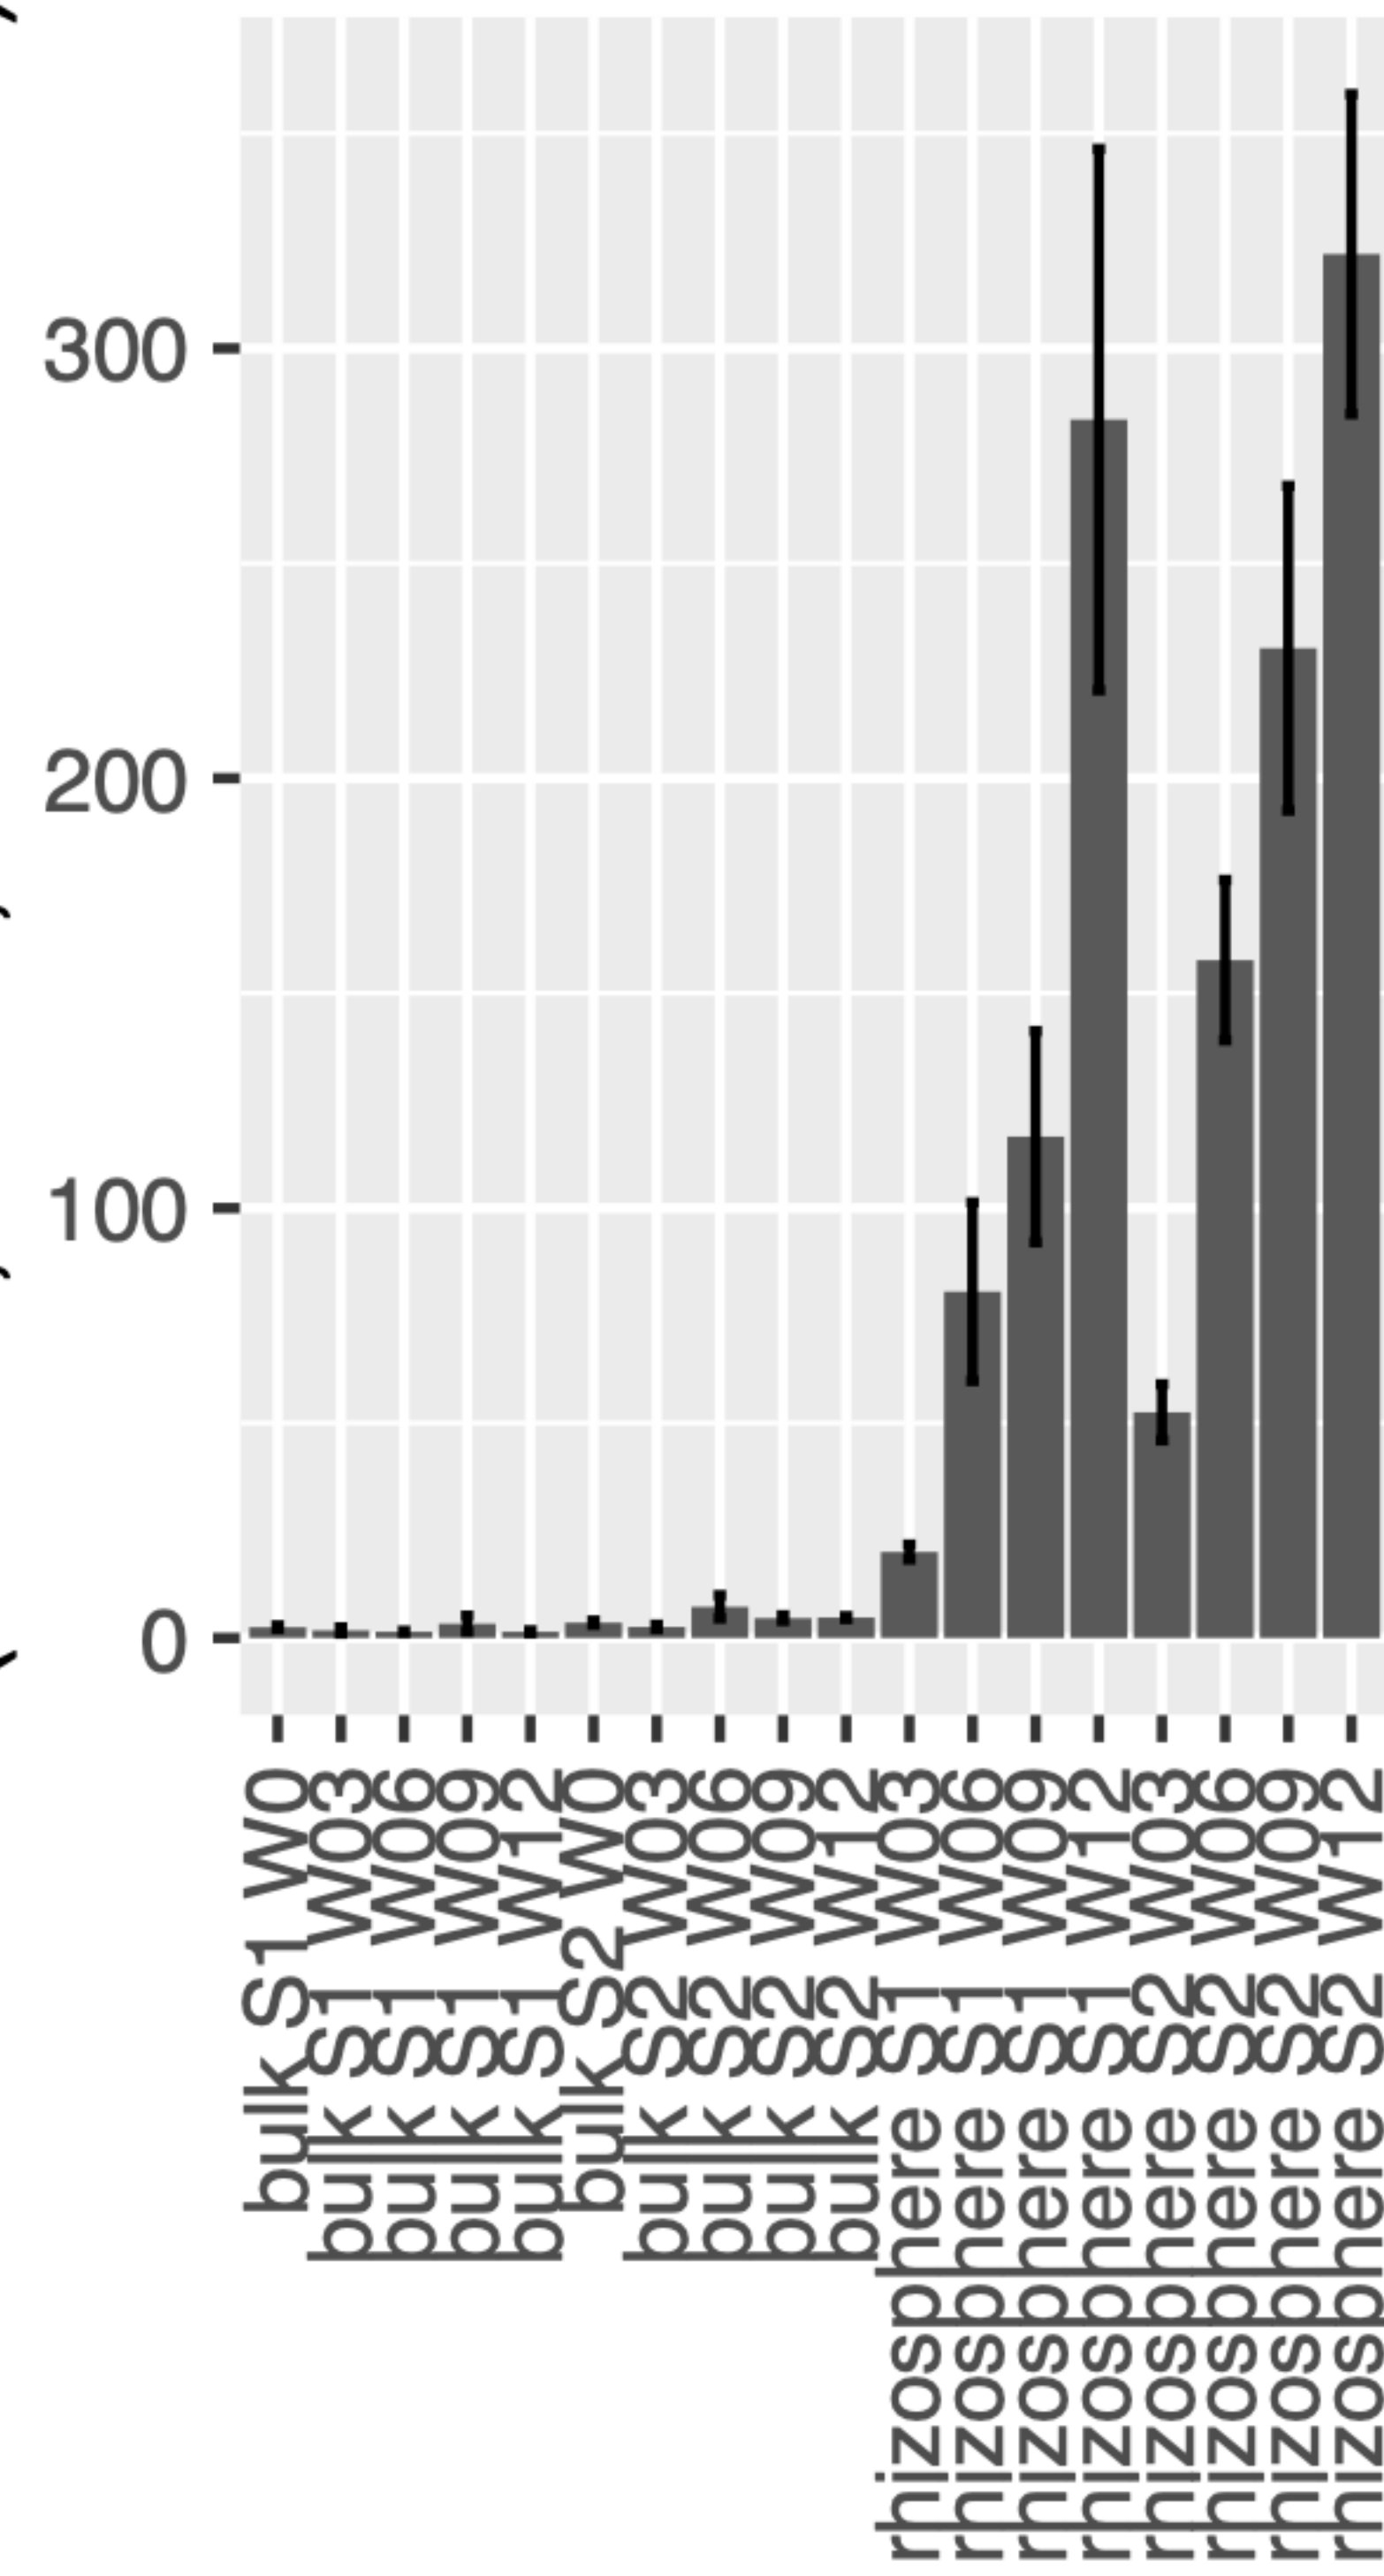

(b)

Abundance of OTU 13989

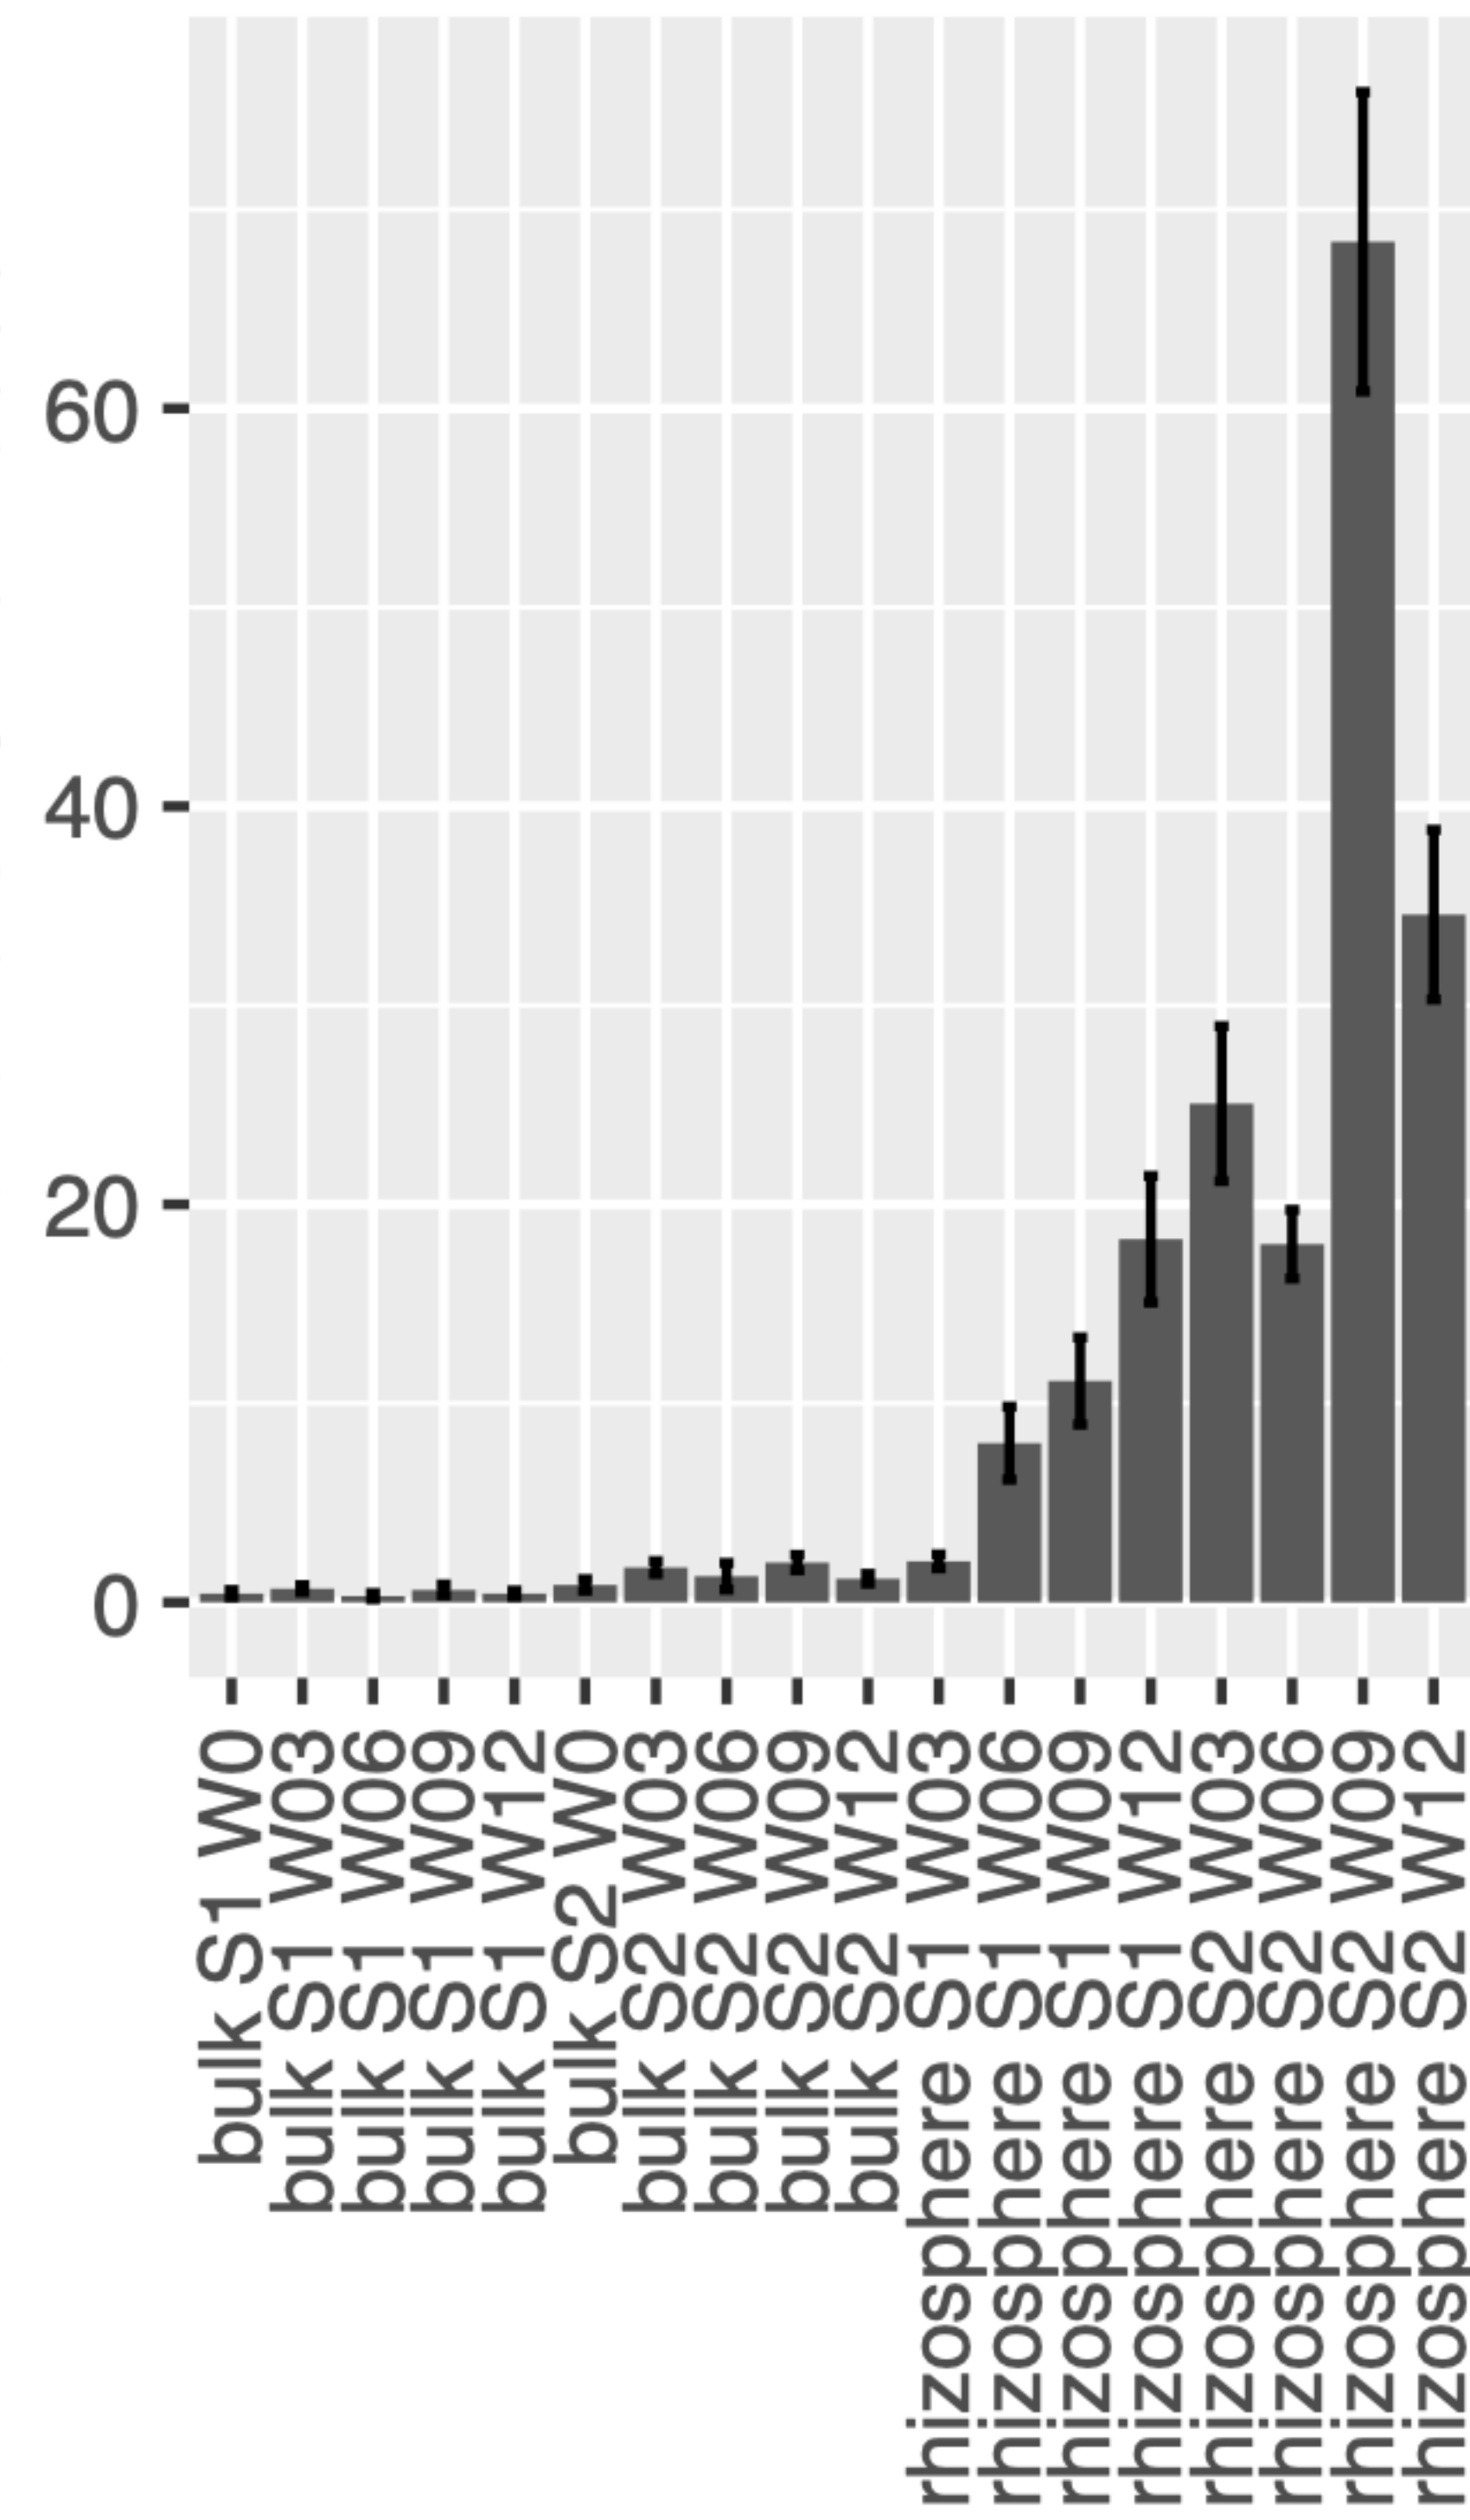

(c)

Abundance of OTU 2124

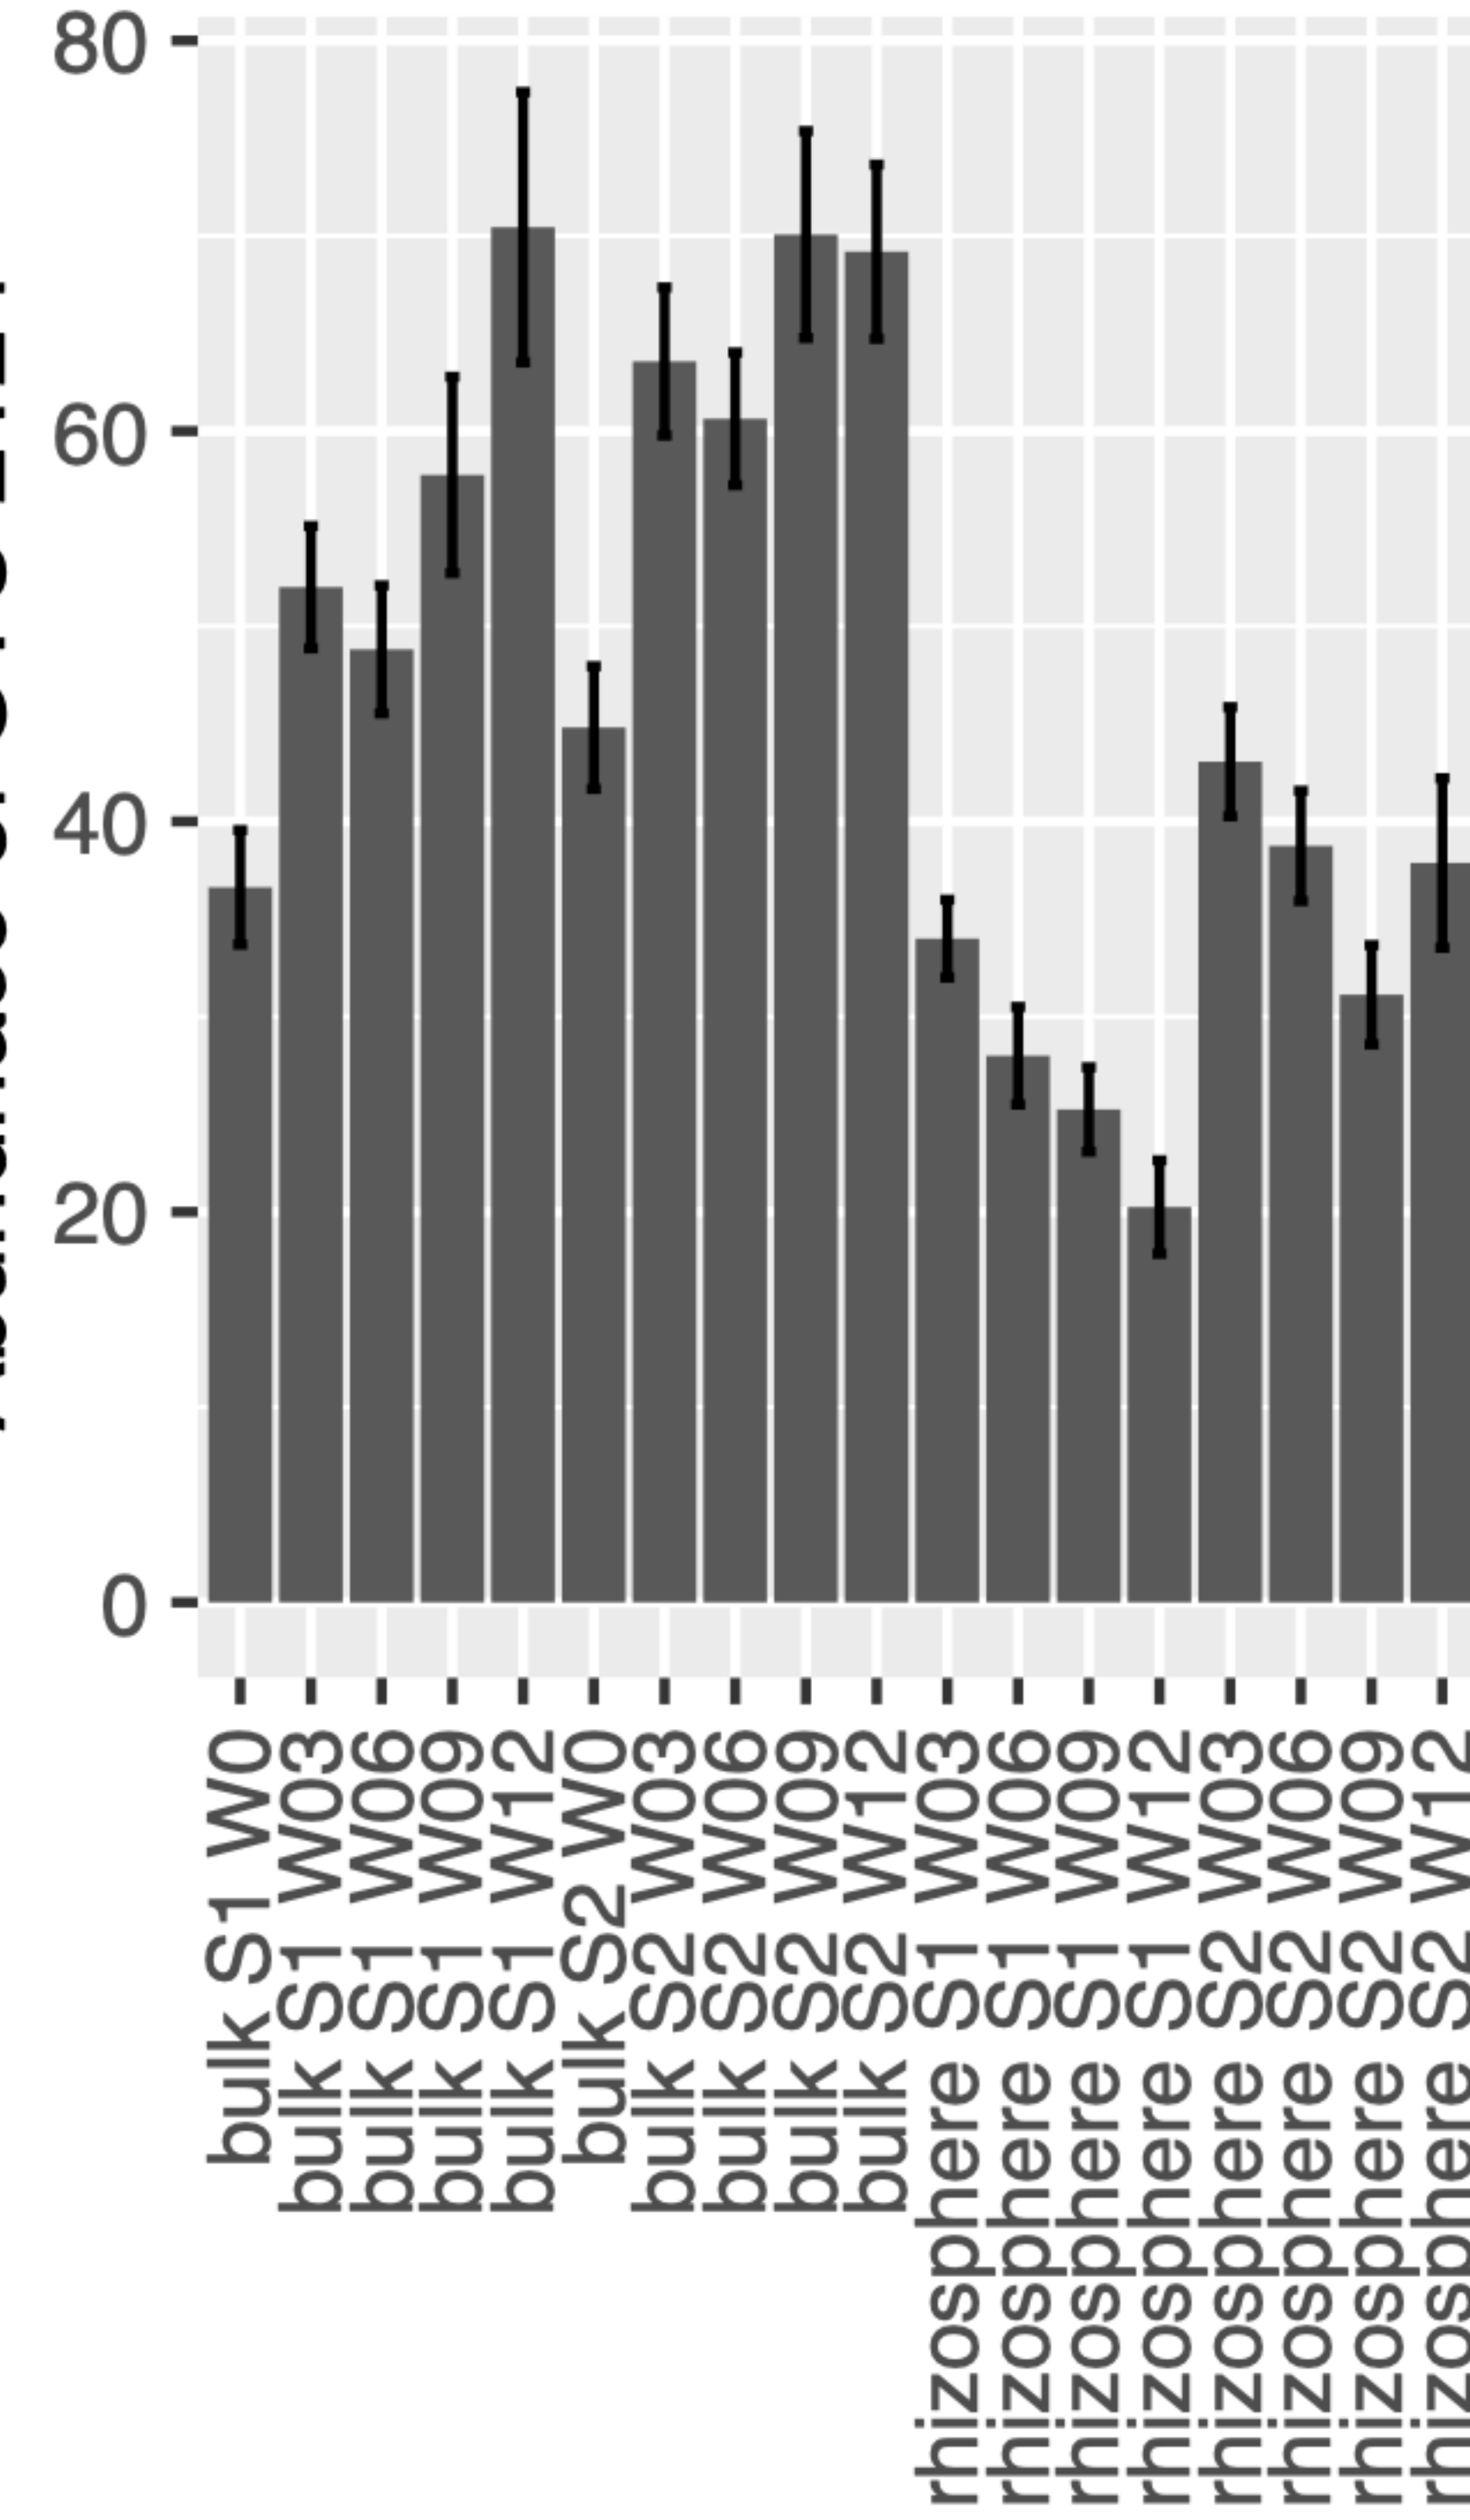

(d)

Abundance of OTU 7765

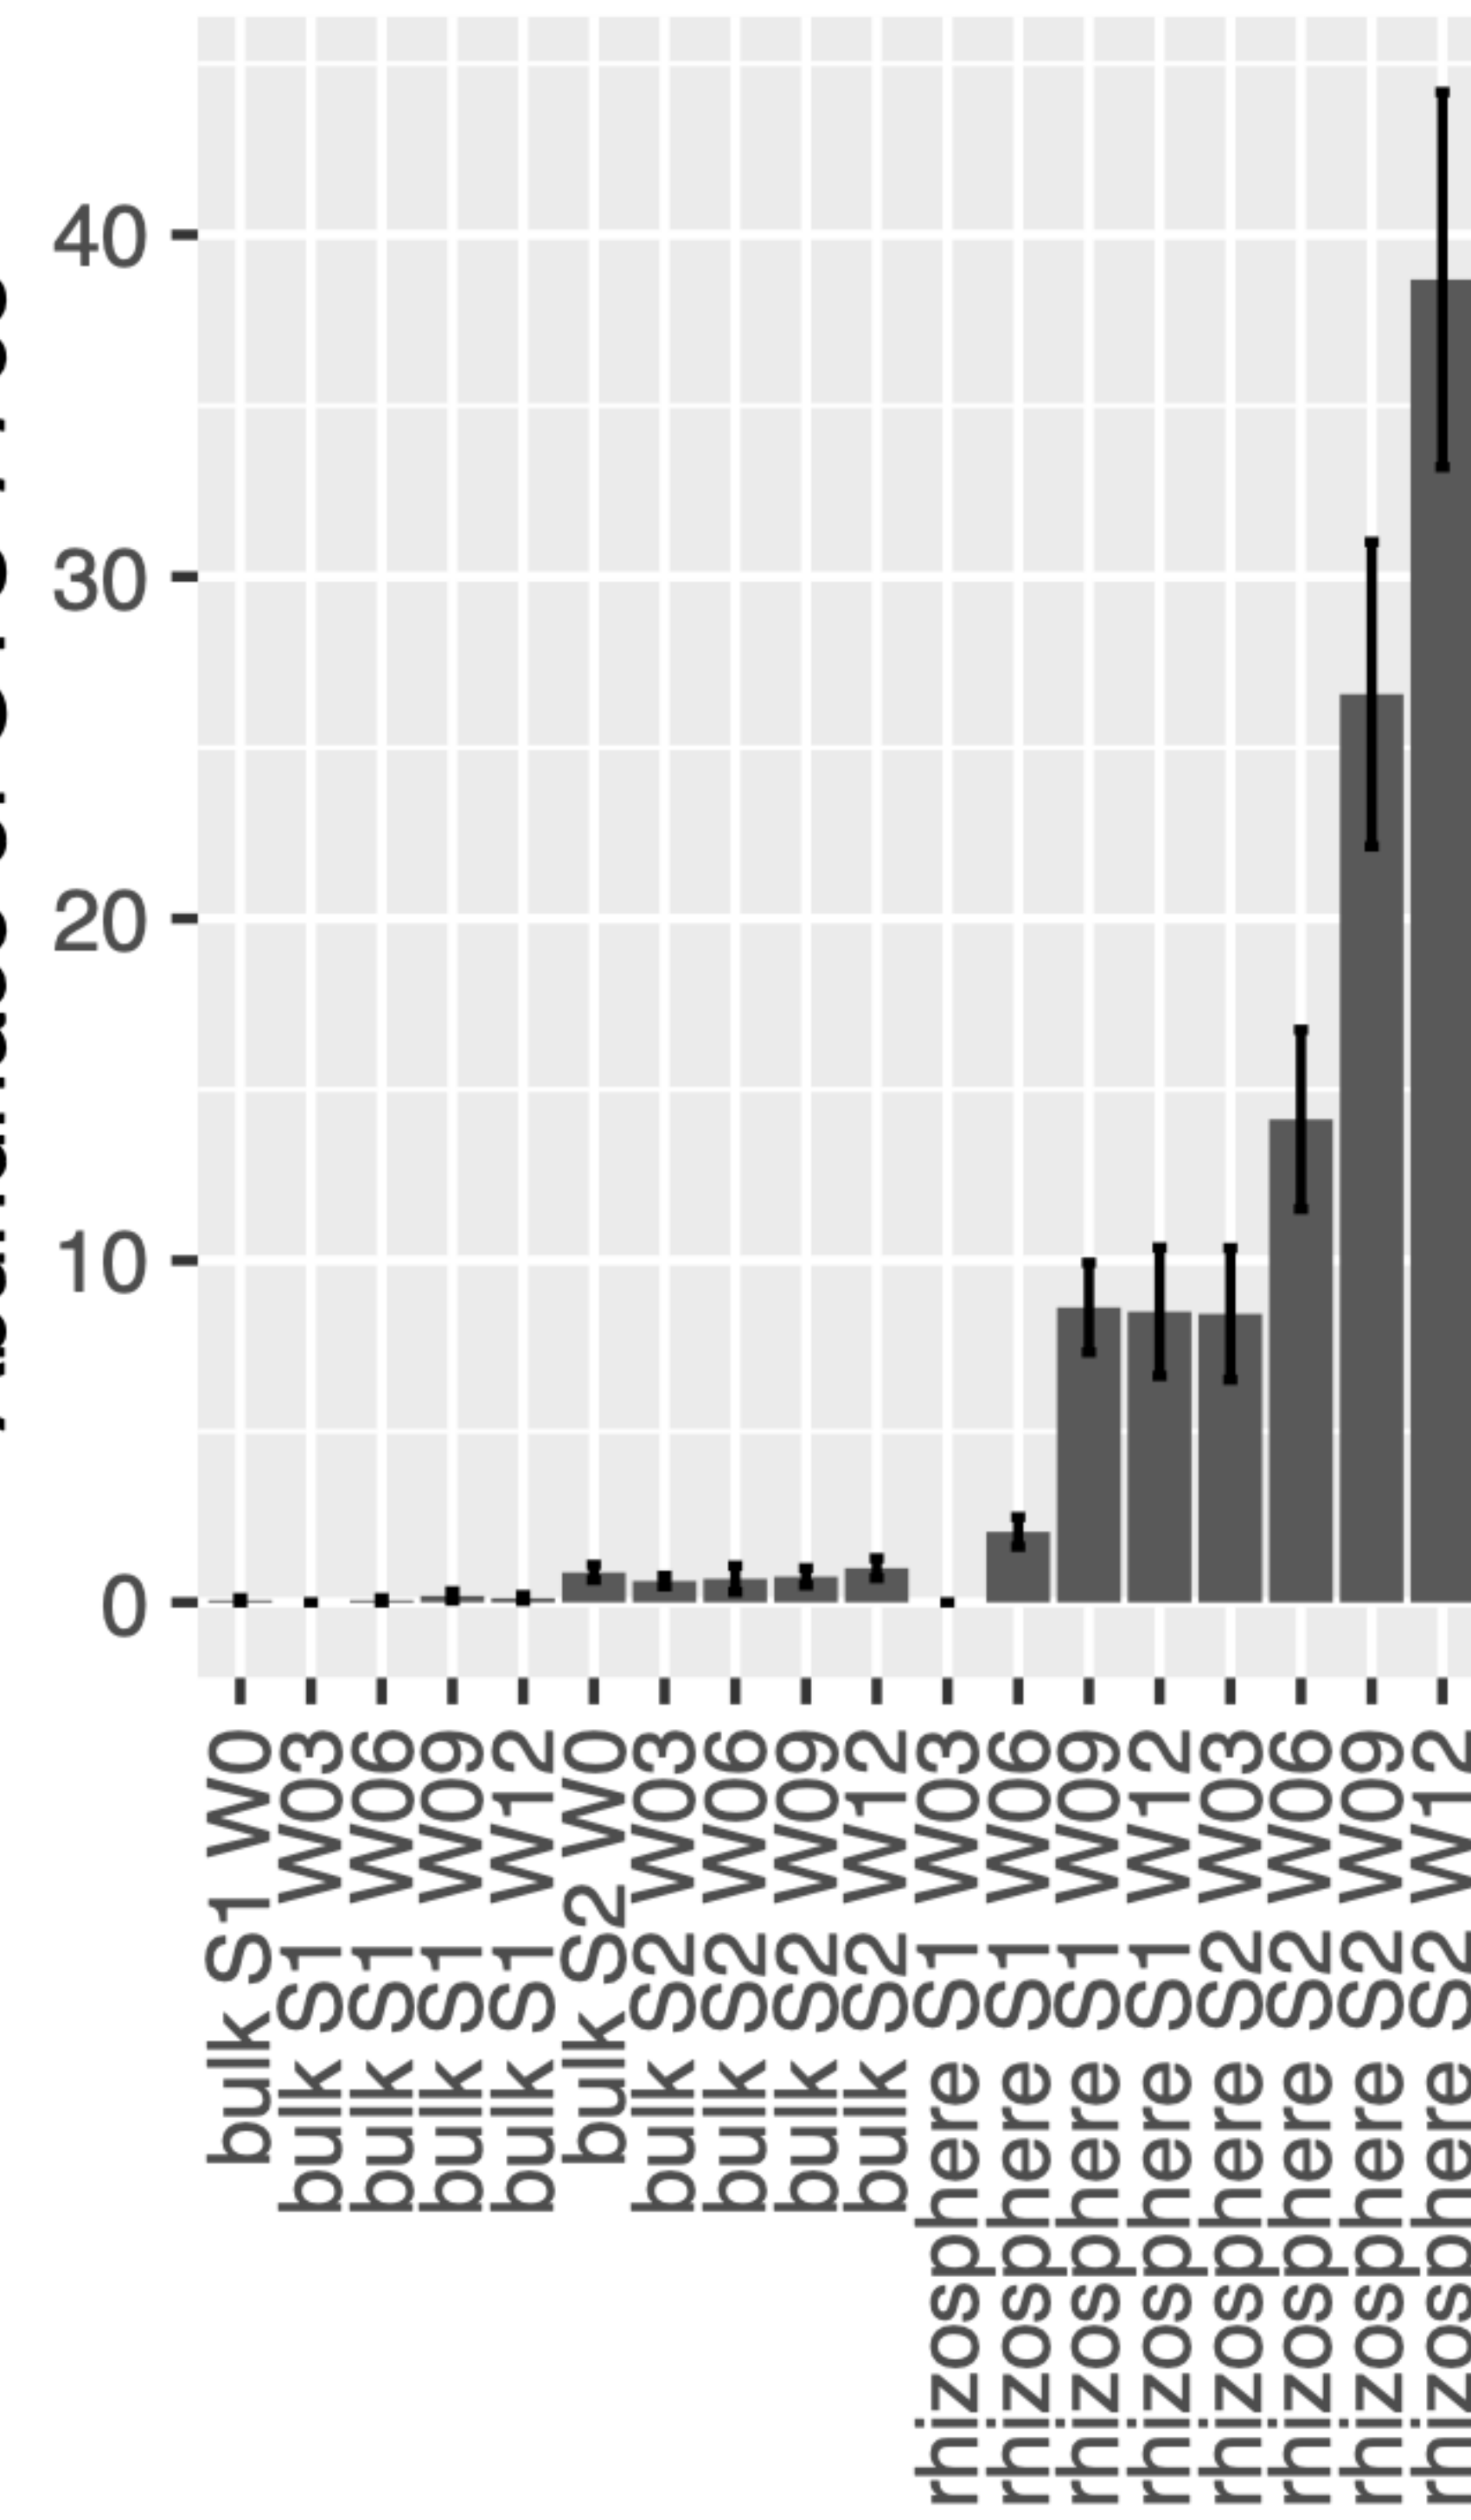

(e)

Abundance of OTU 2178

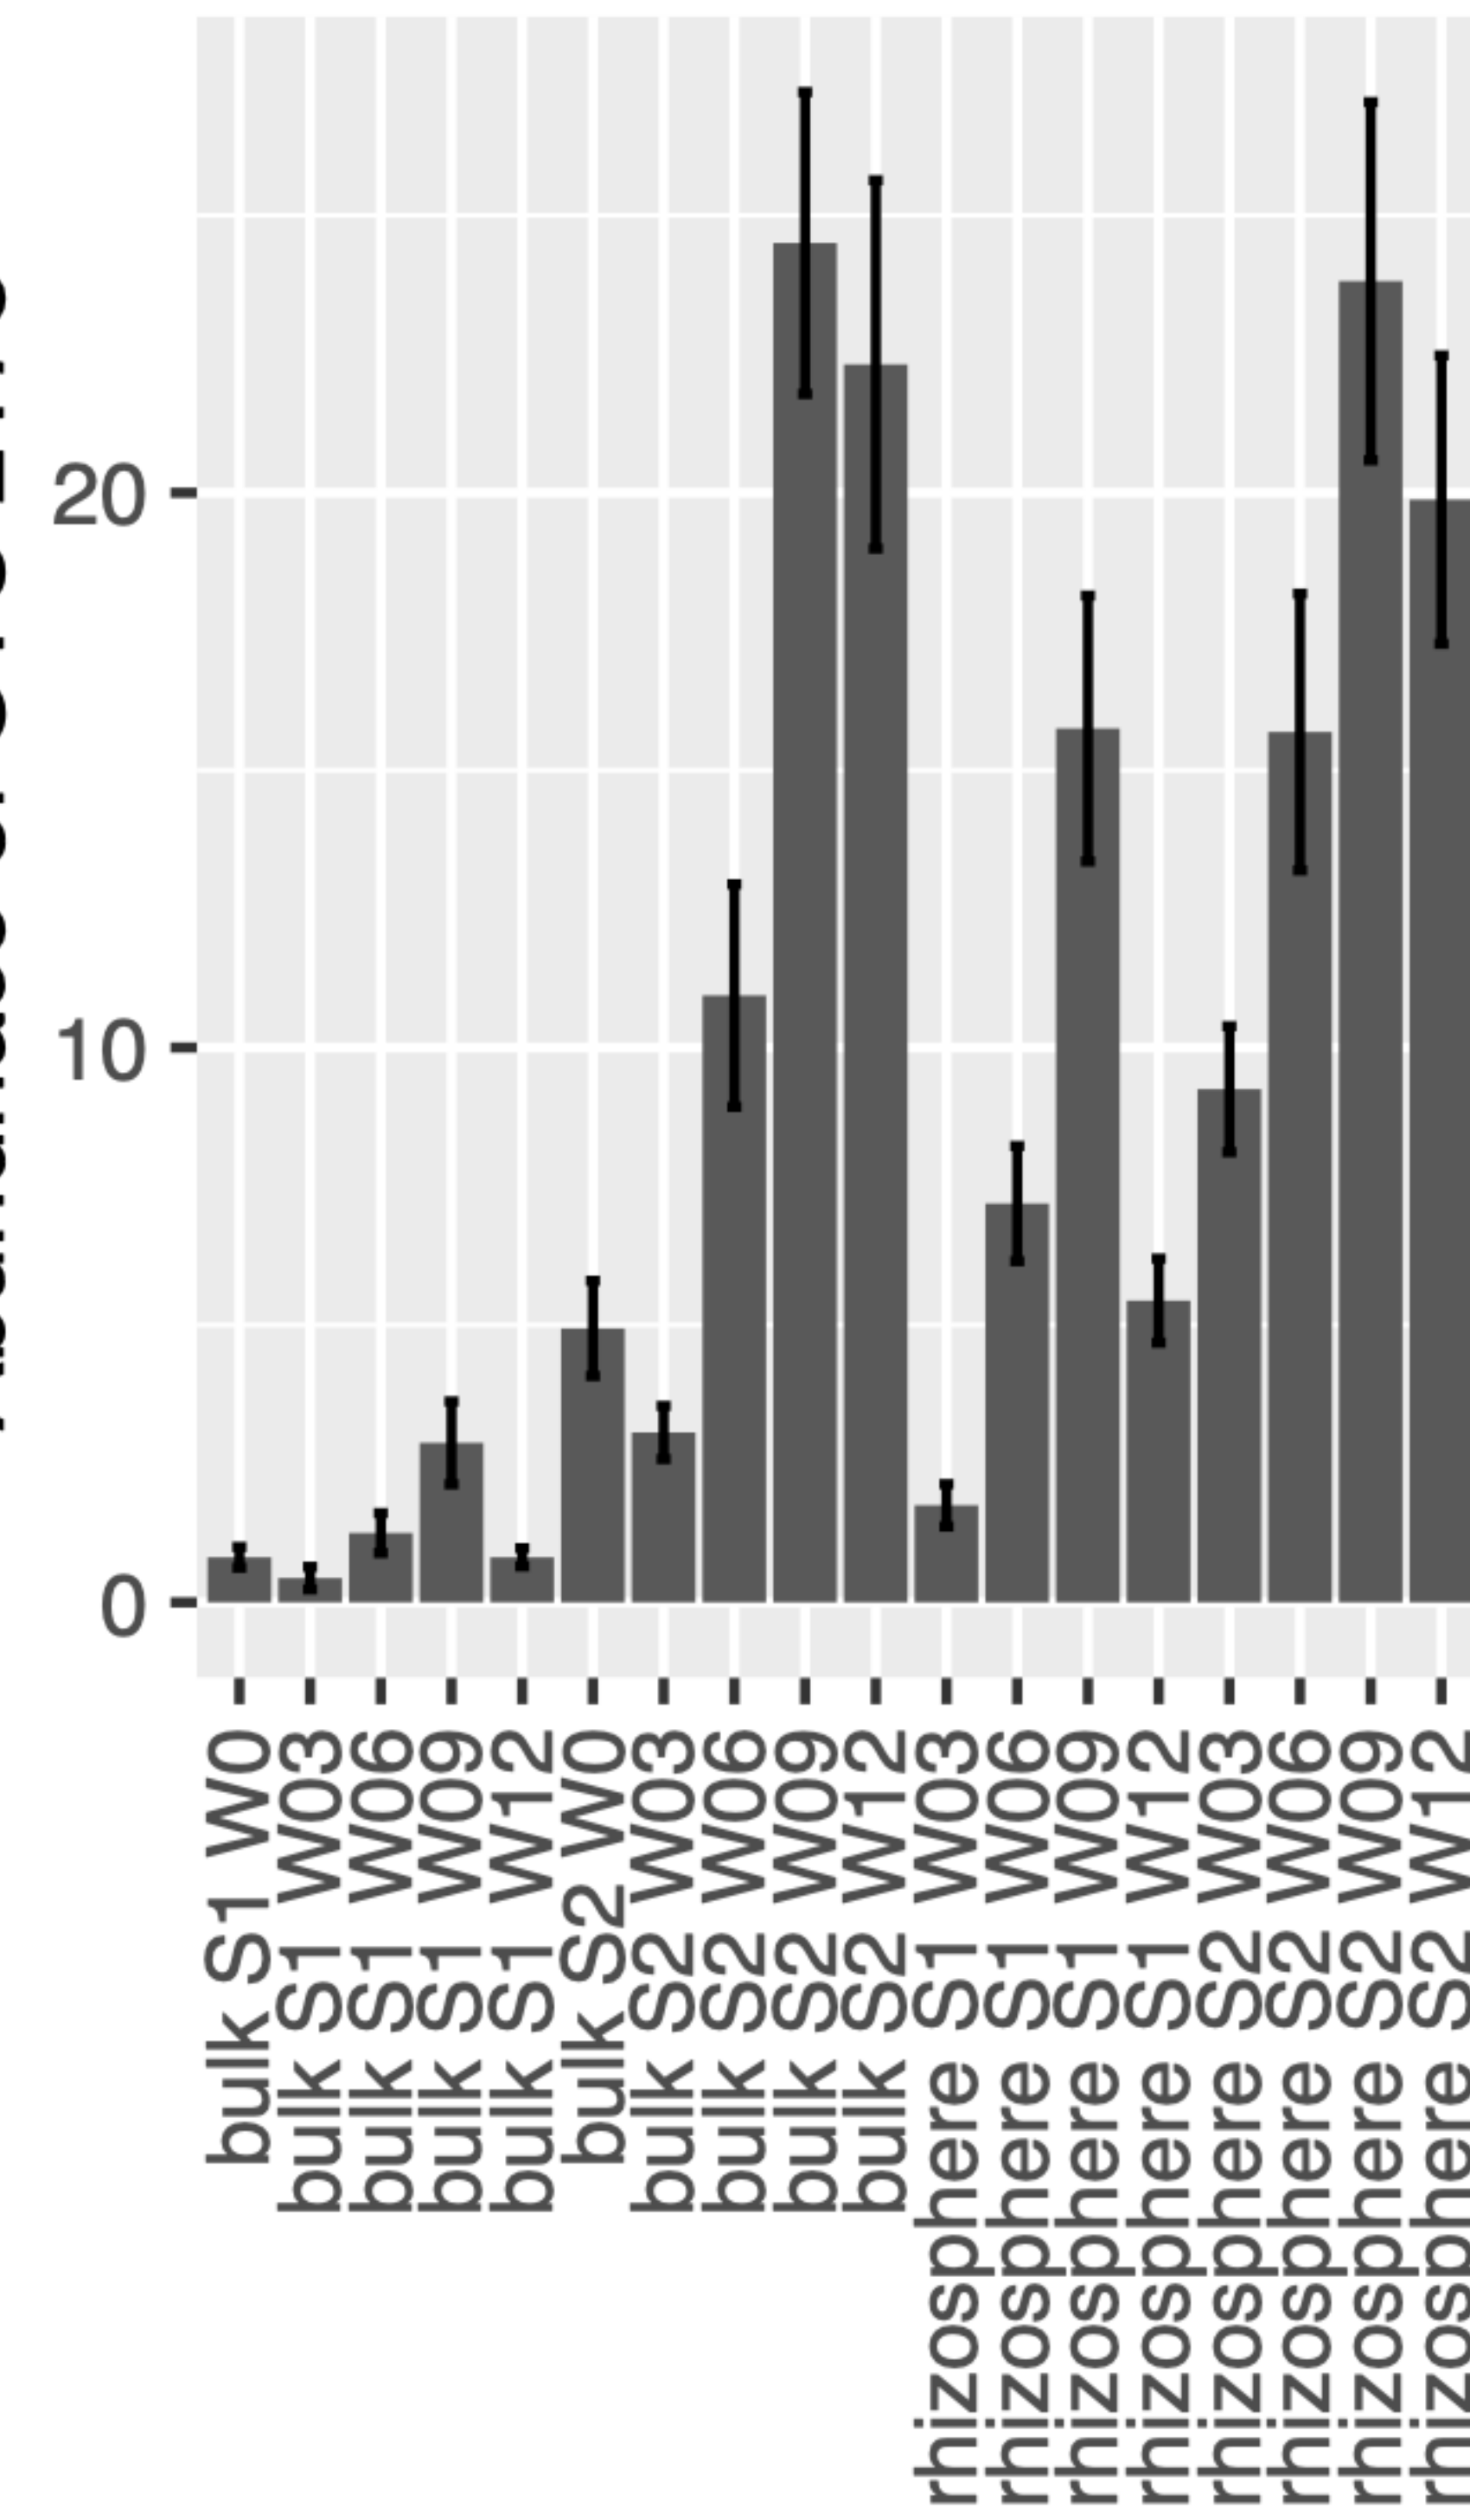

Supplement: mBio.03509-20-sf005.pdf [file mBio.03509-20-sf005.pdf]
