# Supplementary material
Source: PubMed Central journal article supplement (PMC8092305)

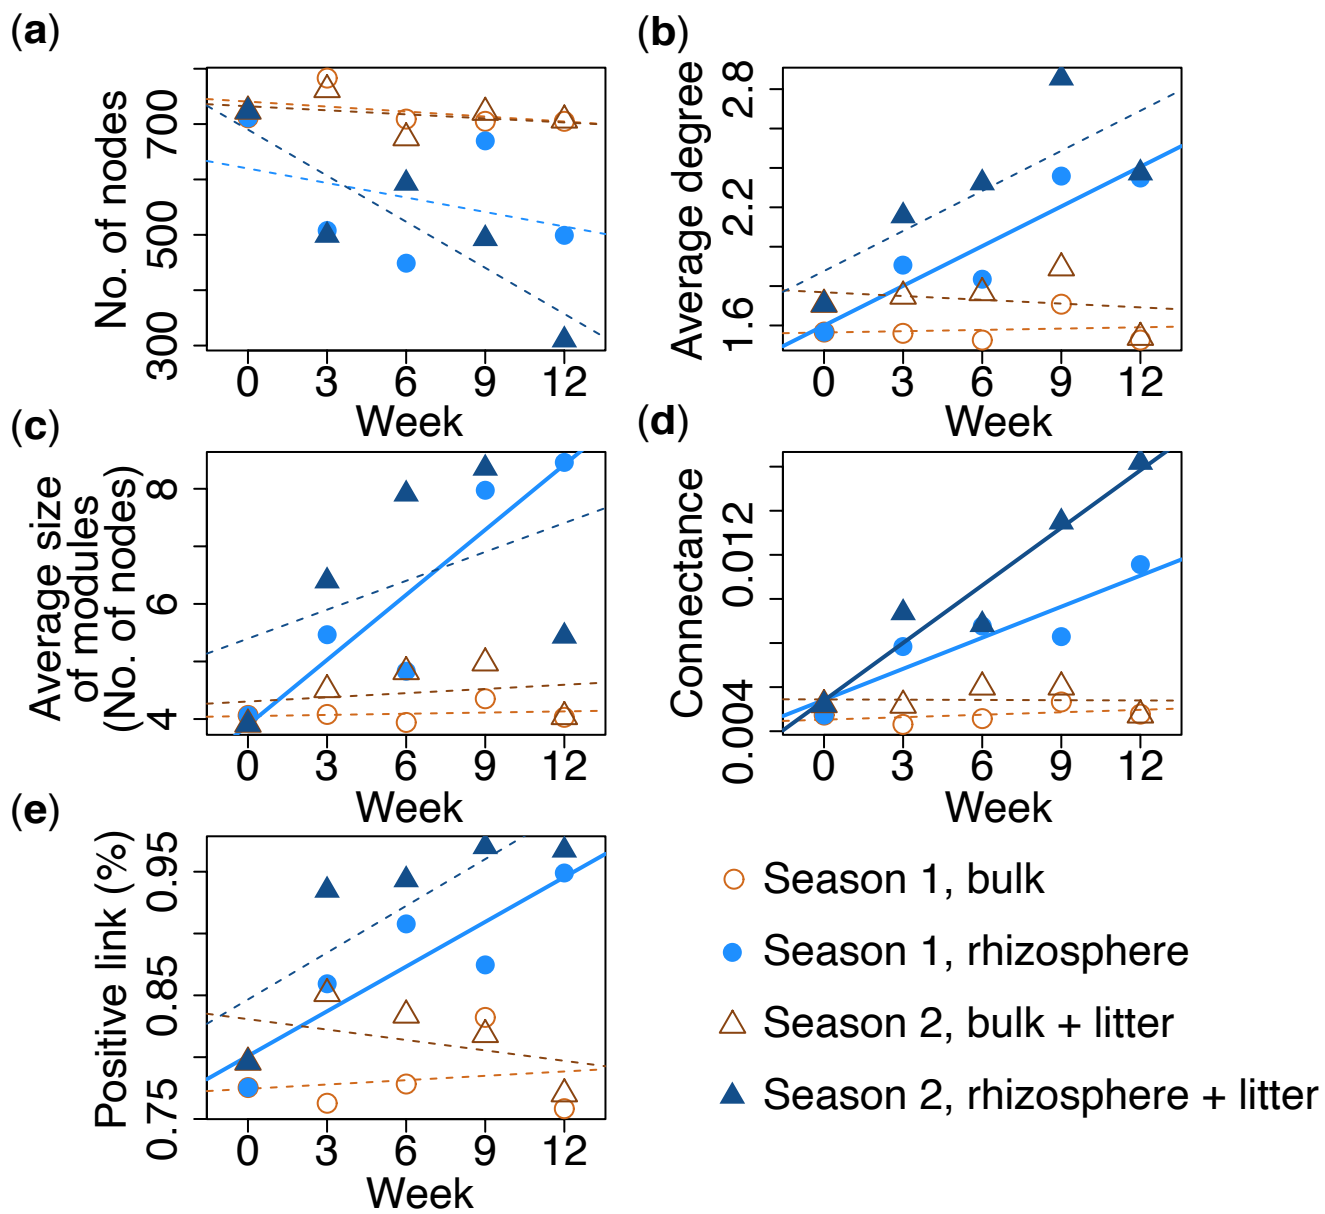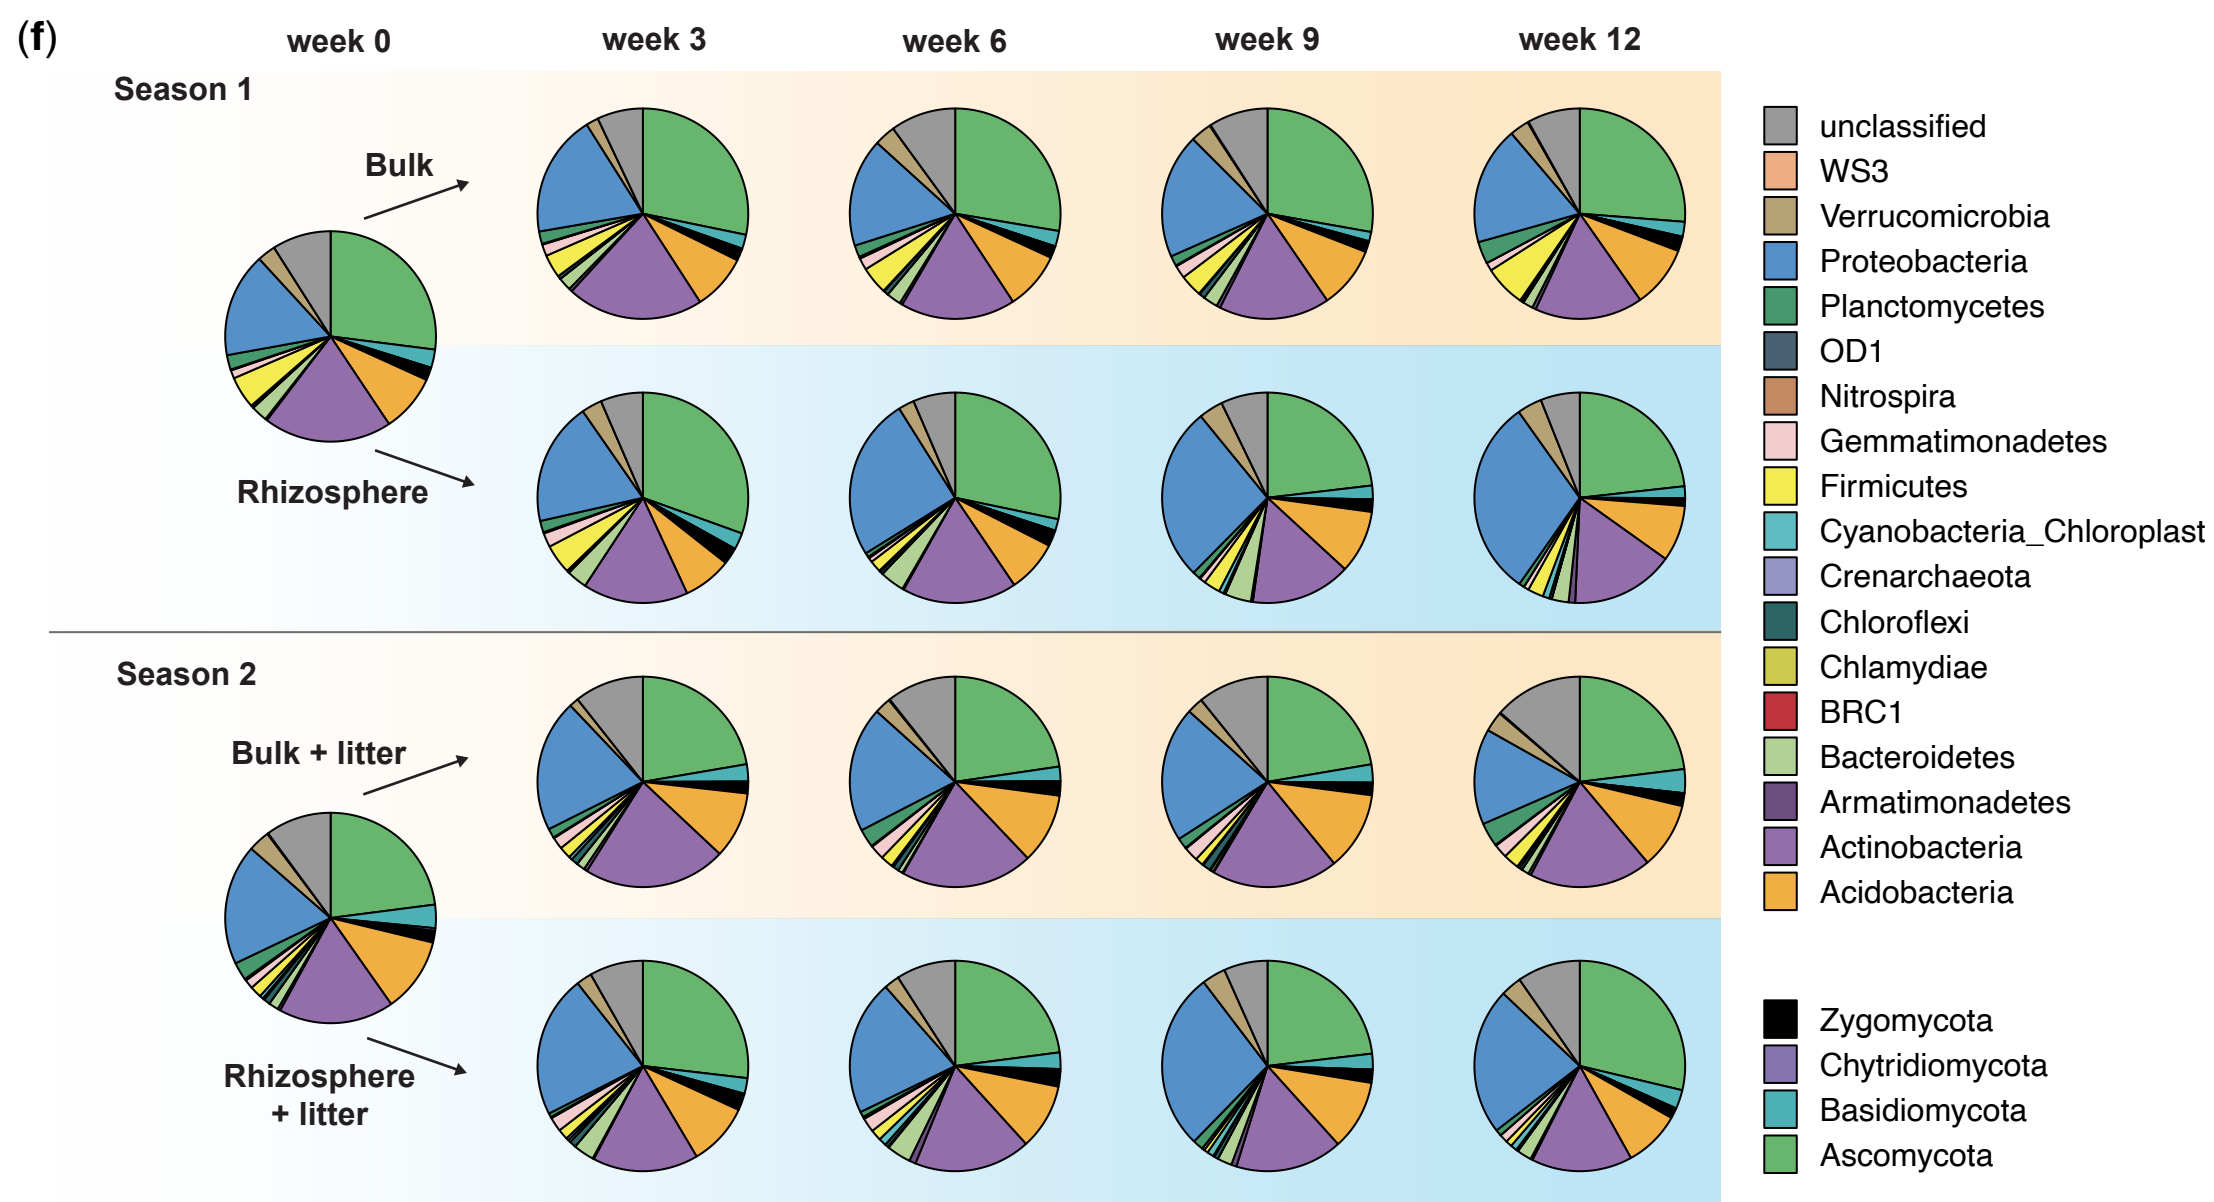

Supplement: mBio.03509-20-sf002.pdf [file mBio.03509-20-sf002.pdf]

○ season 1, bulk      △ season 2, residual  
 ● season 1, rhizosphere      ▲ season 2, rhizosphere

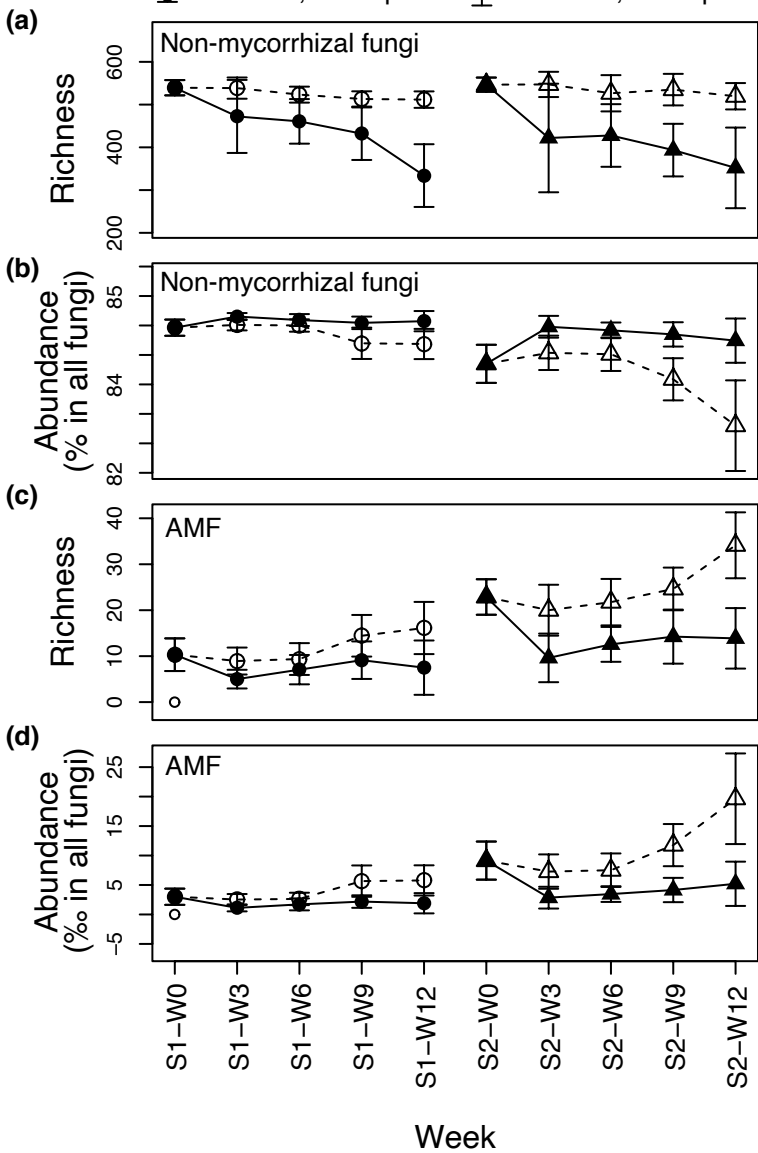

Supplement: mBio.03509-20-sf003.pdf [file mBio.03509-20-sf003.pdf]

**(a)**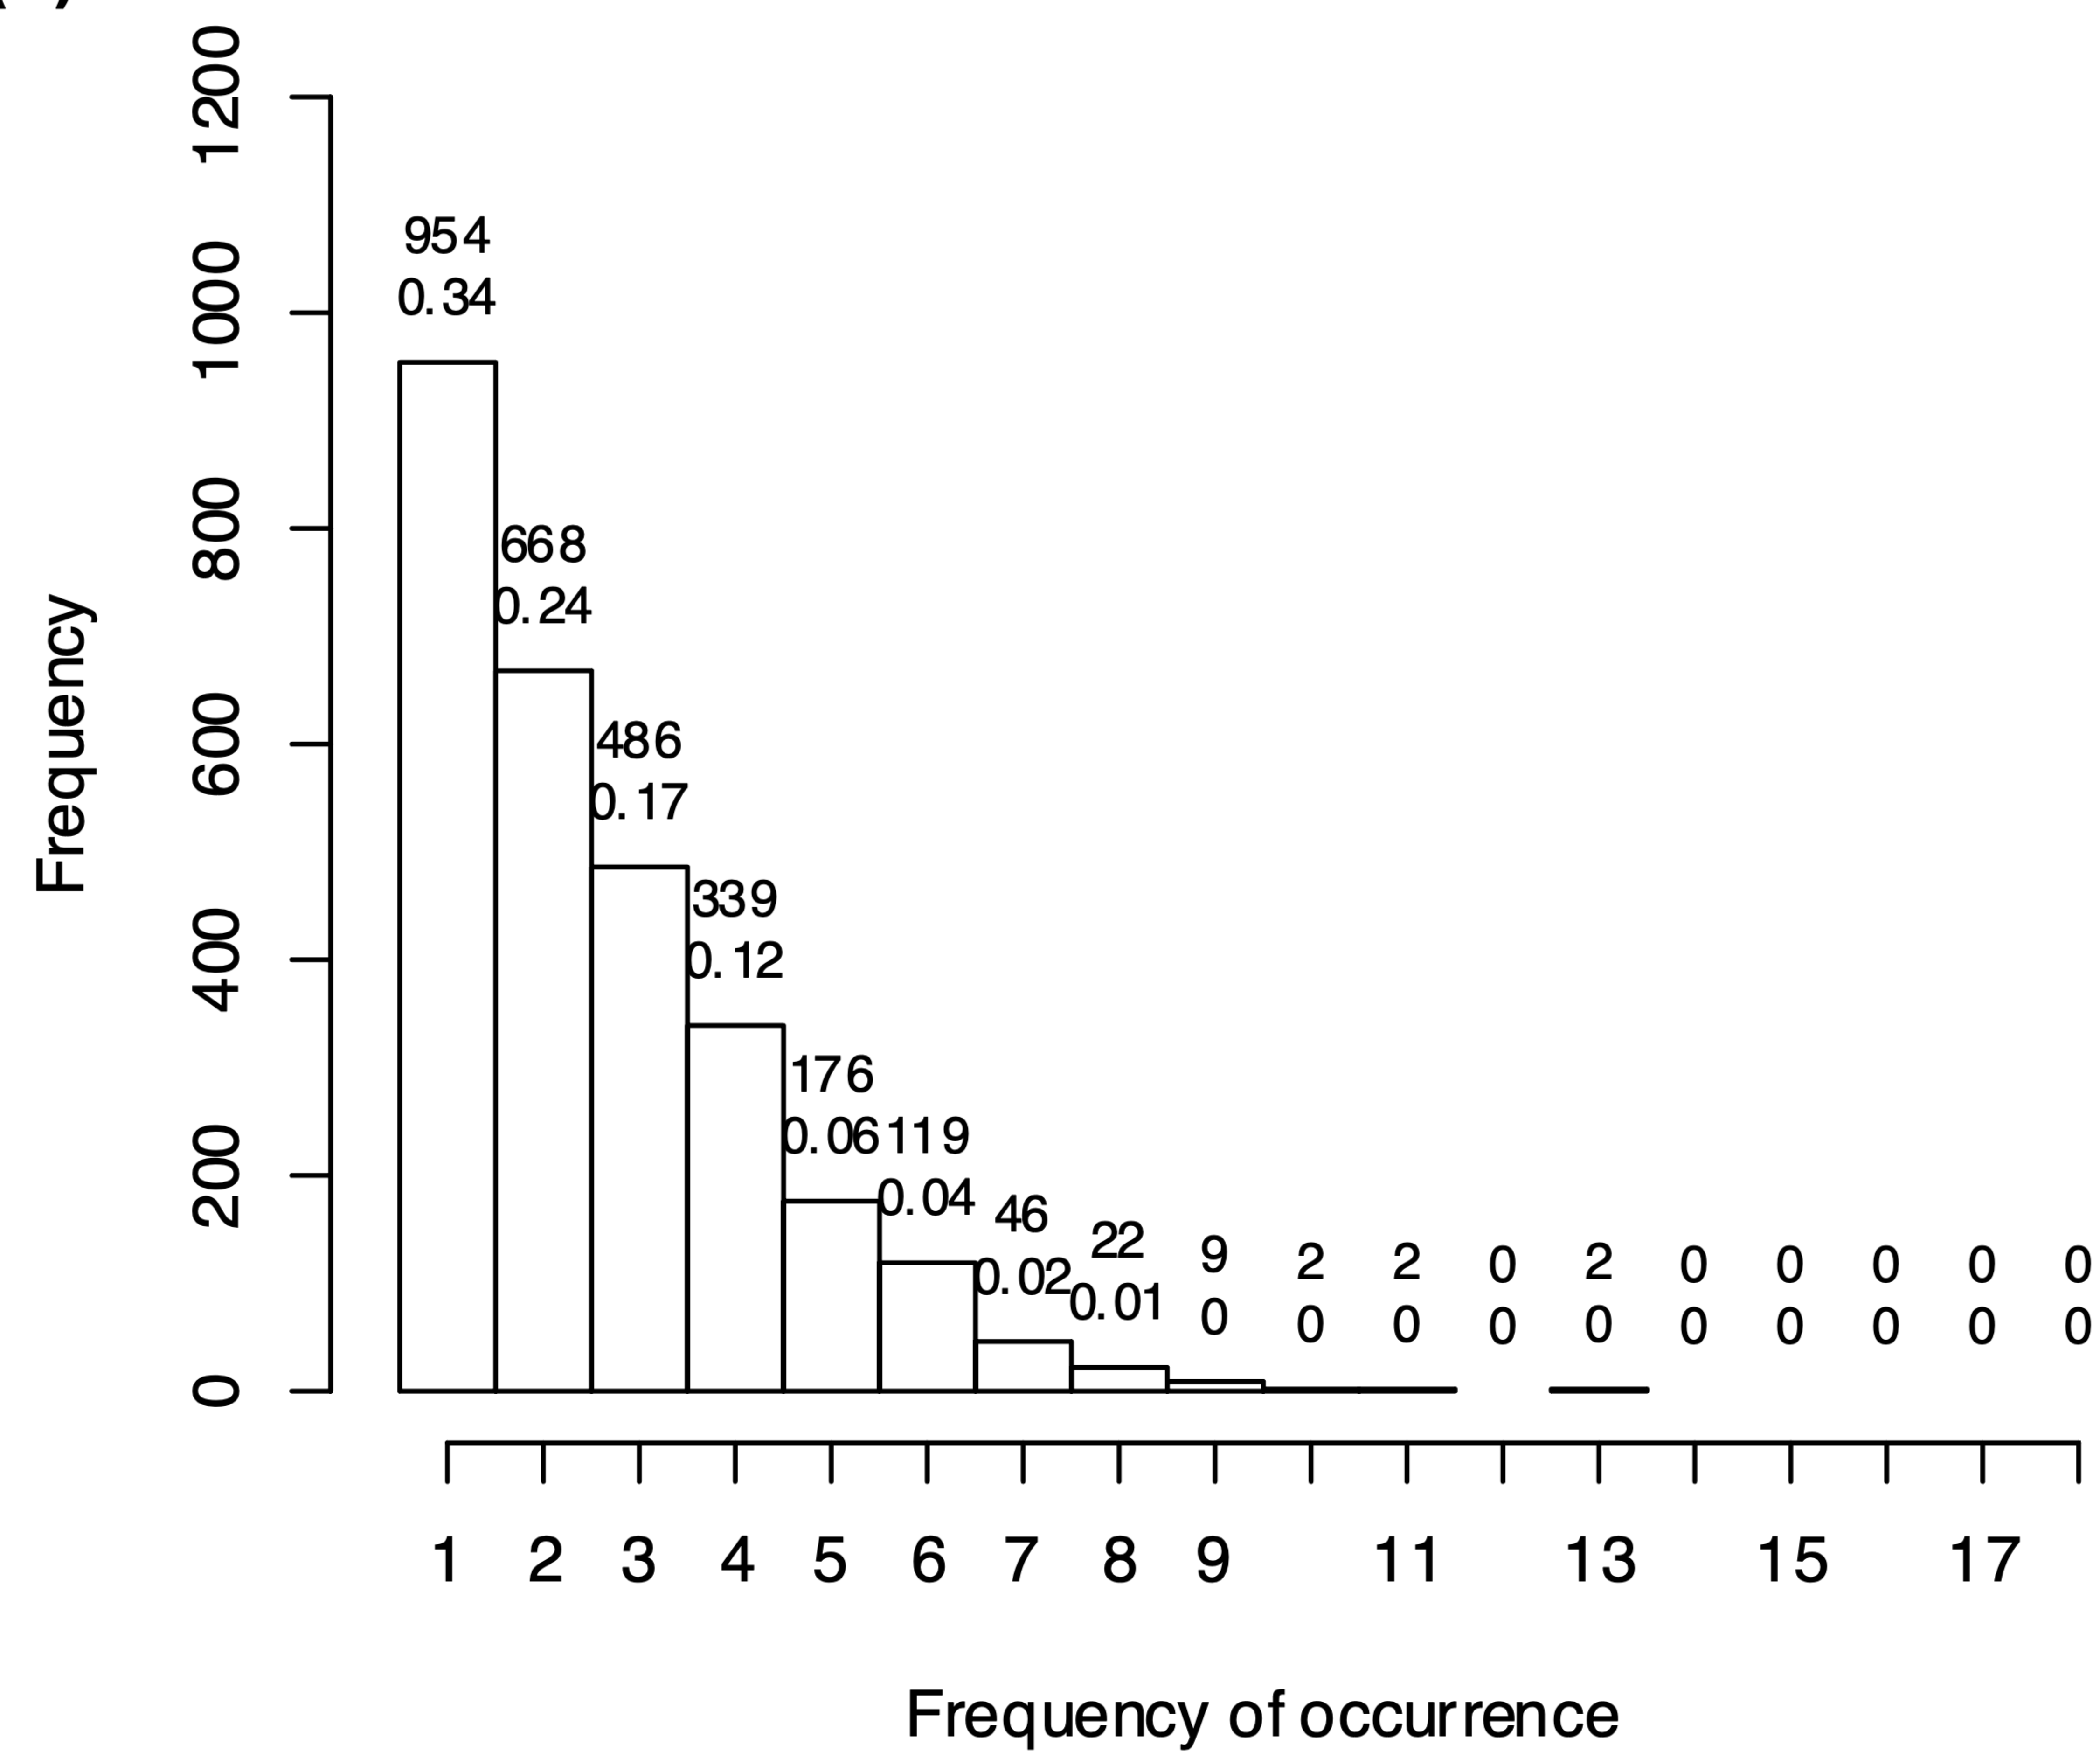**(b)**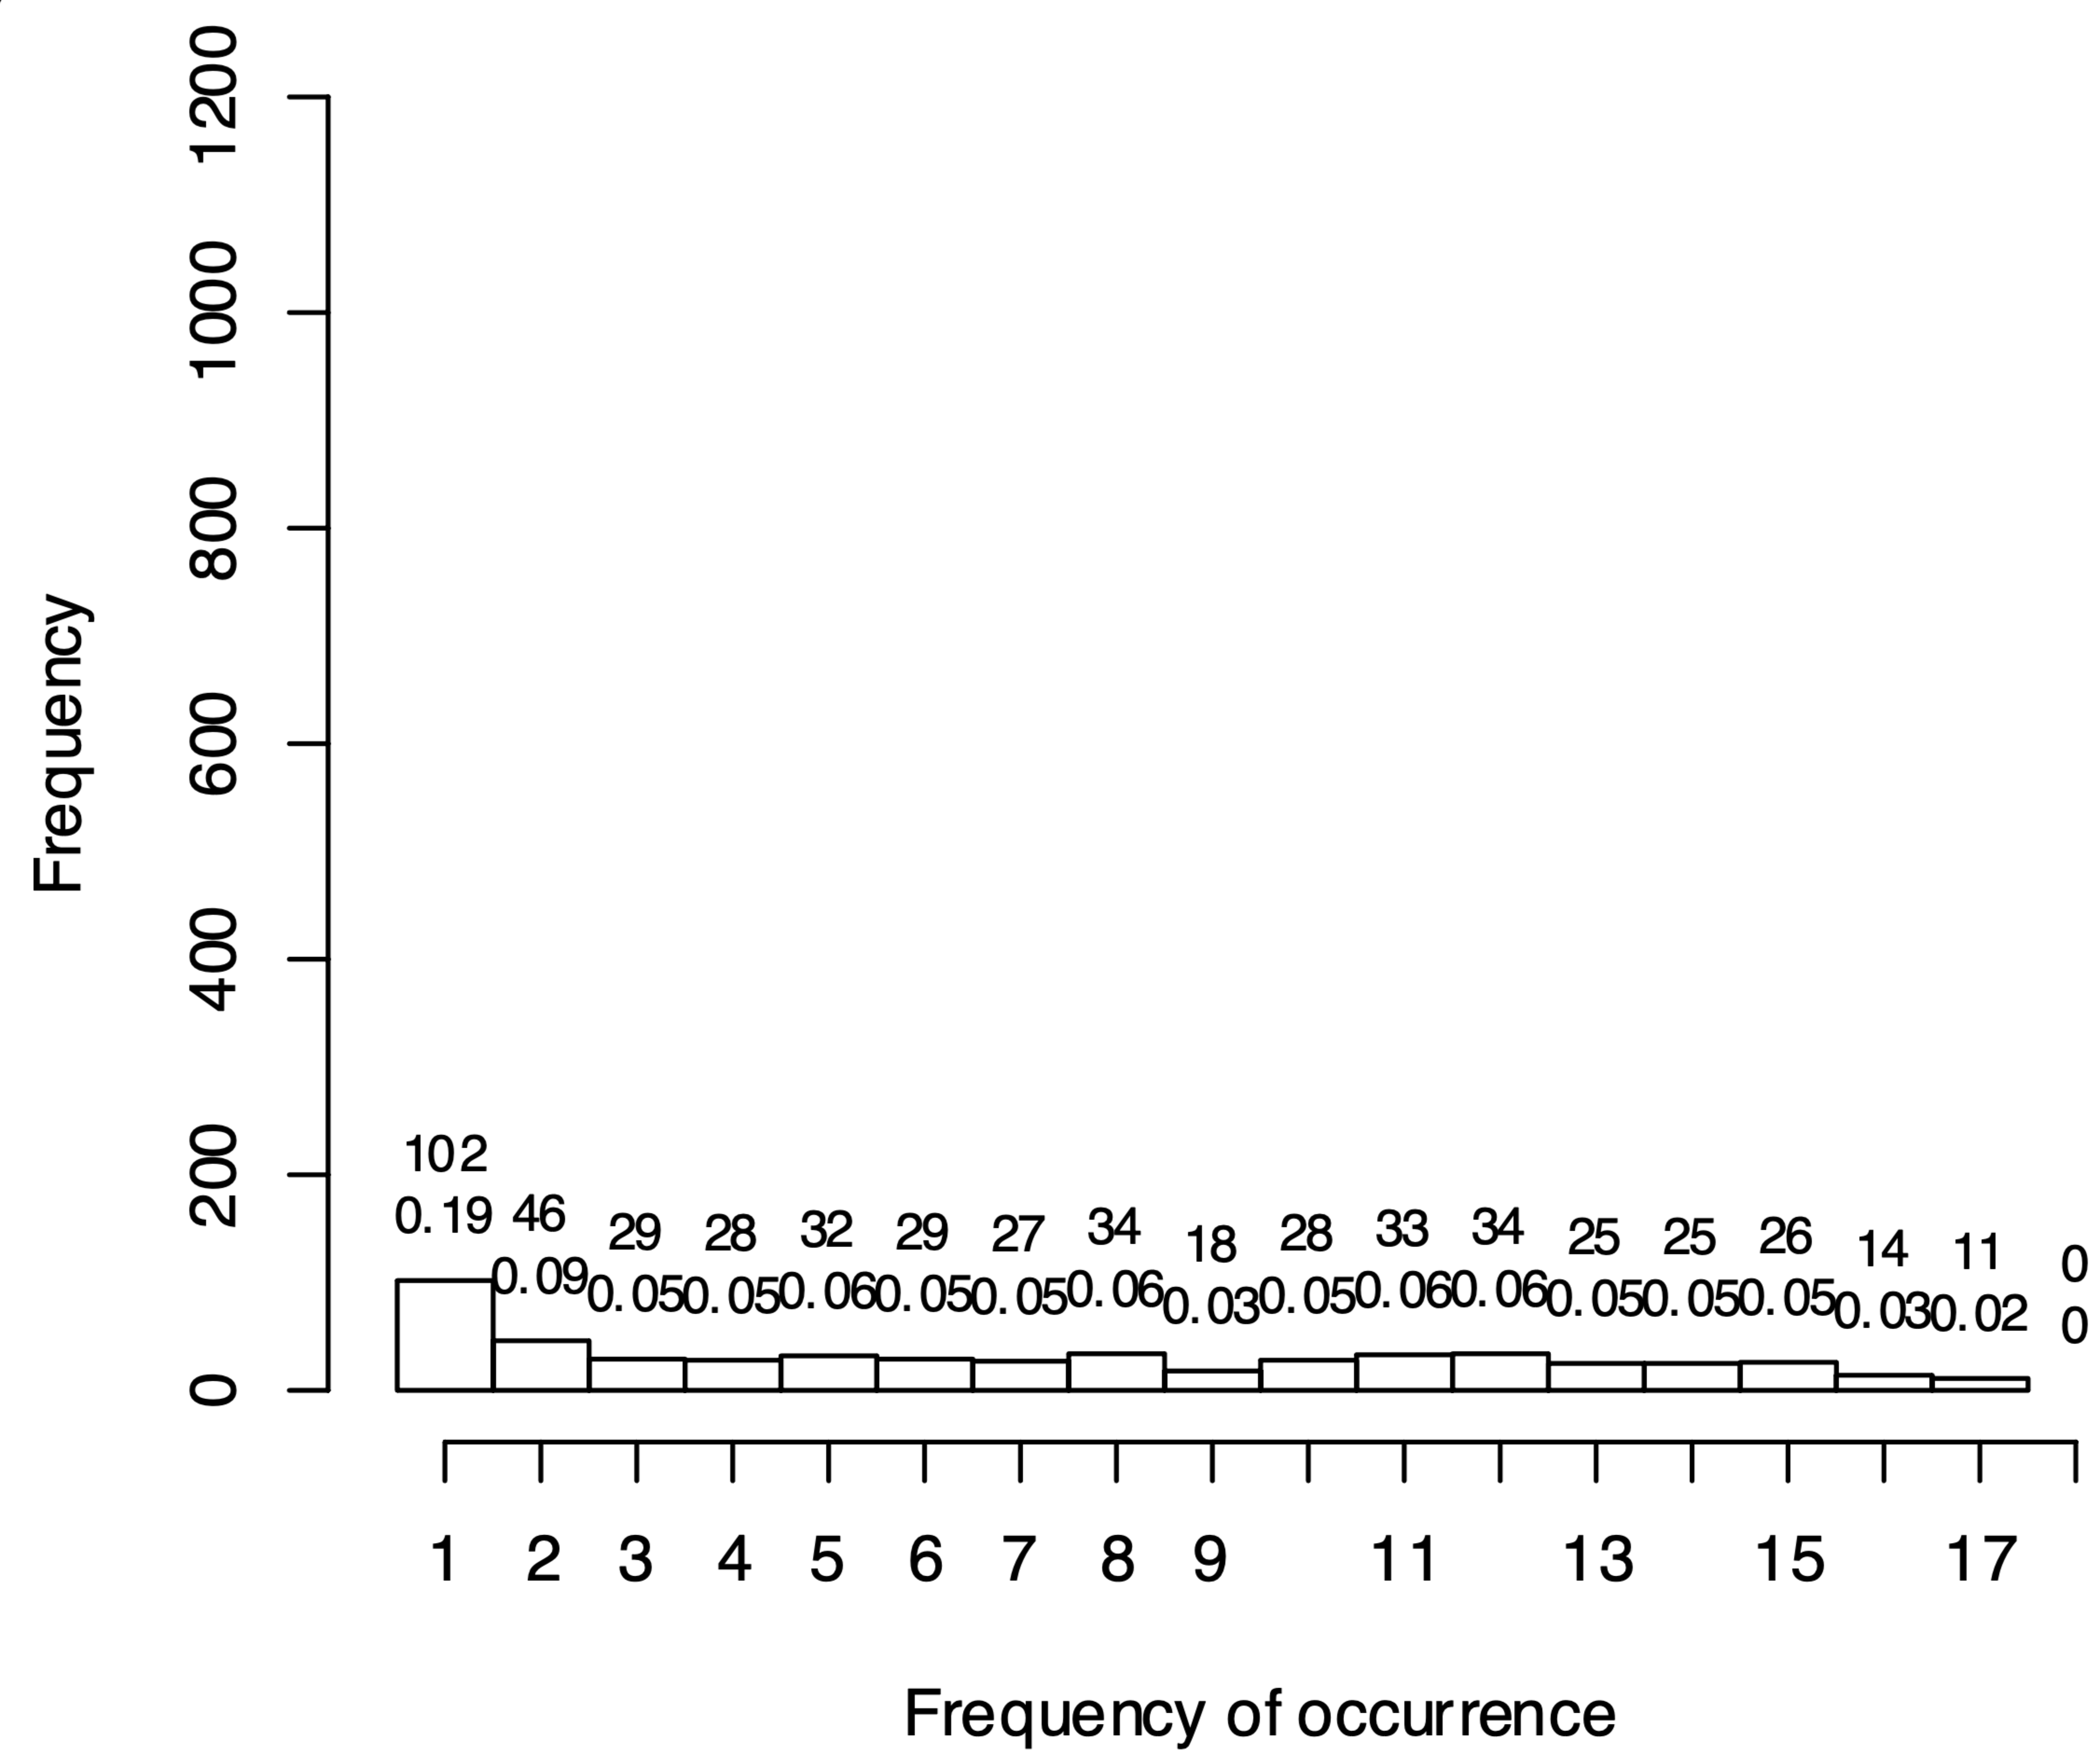**(c)**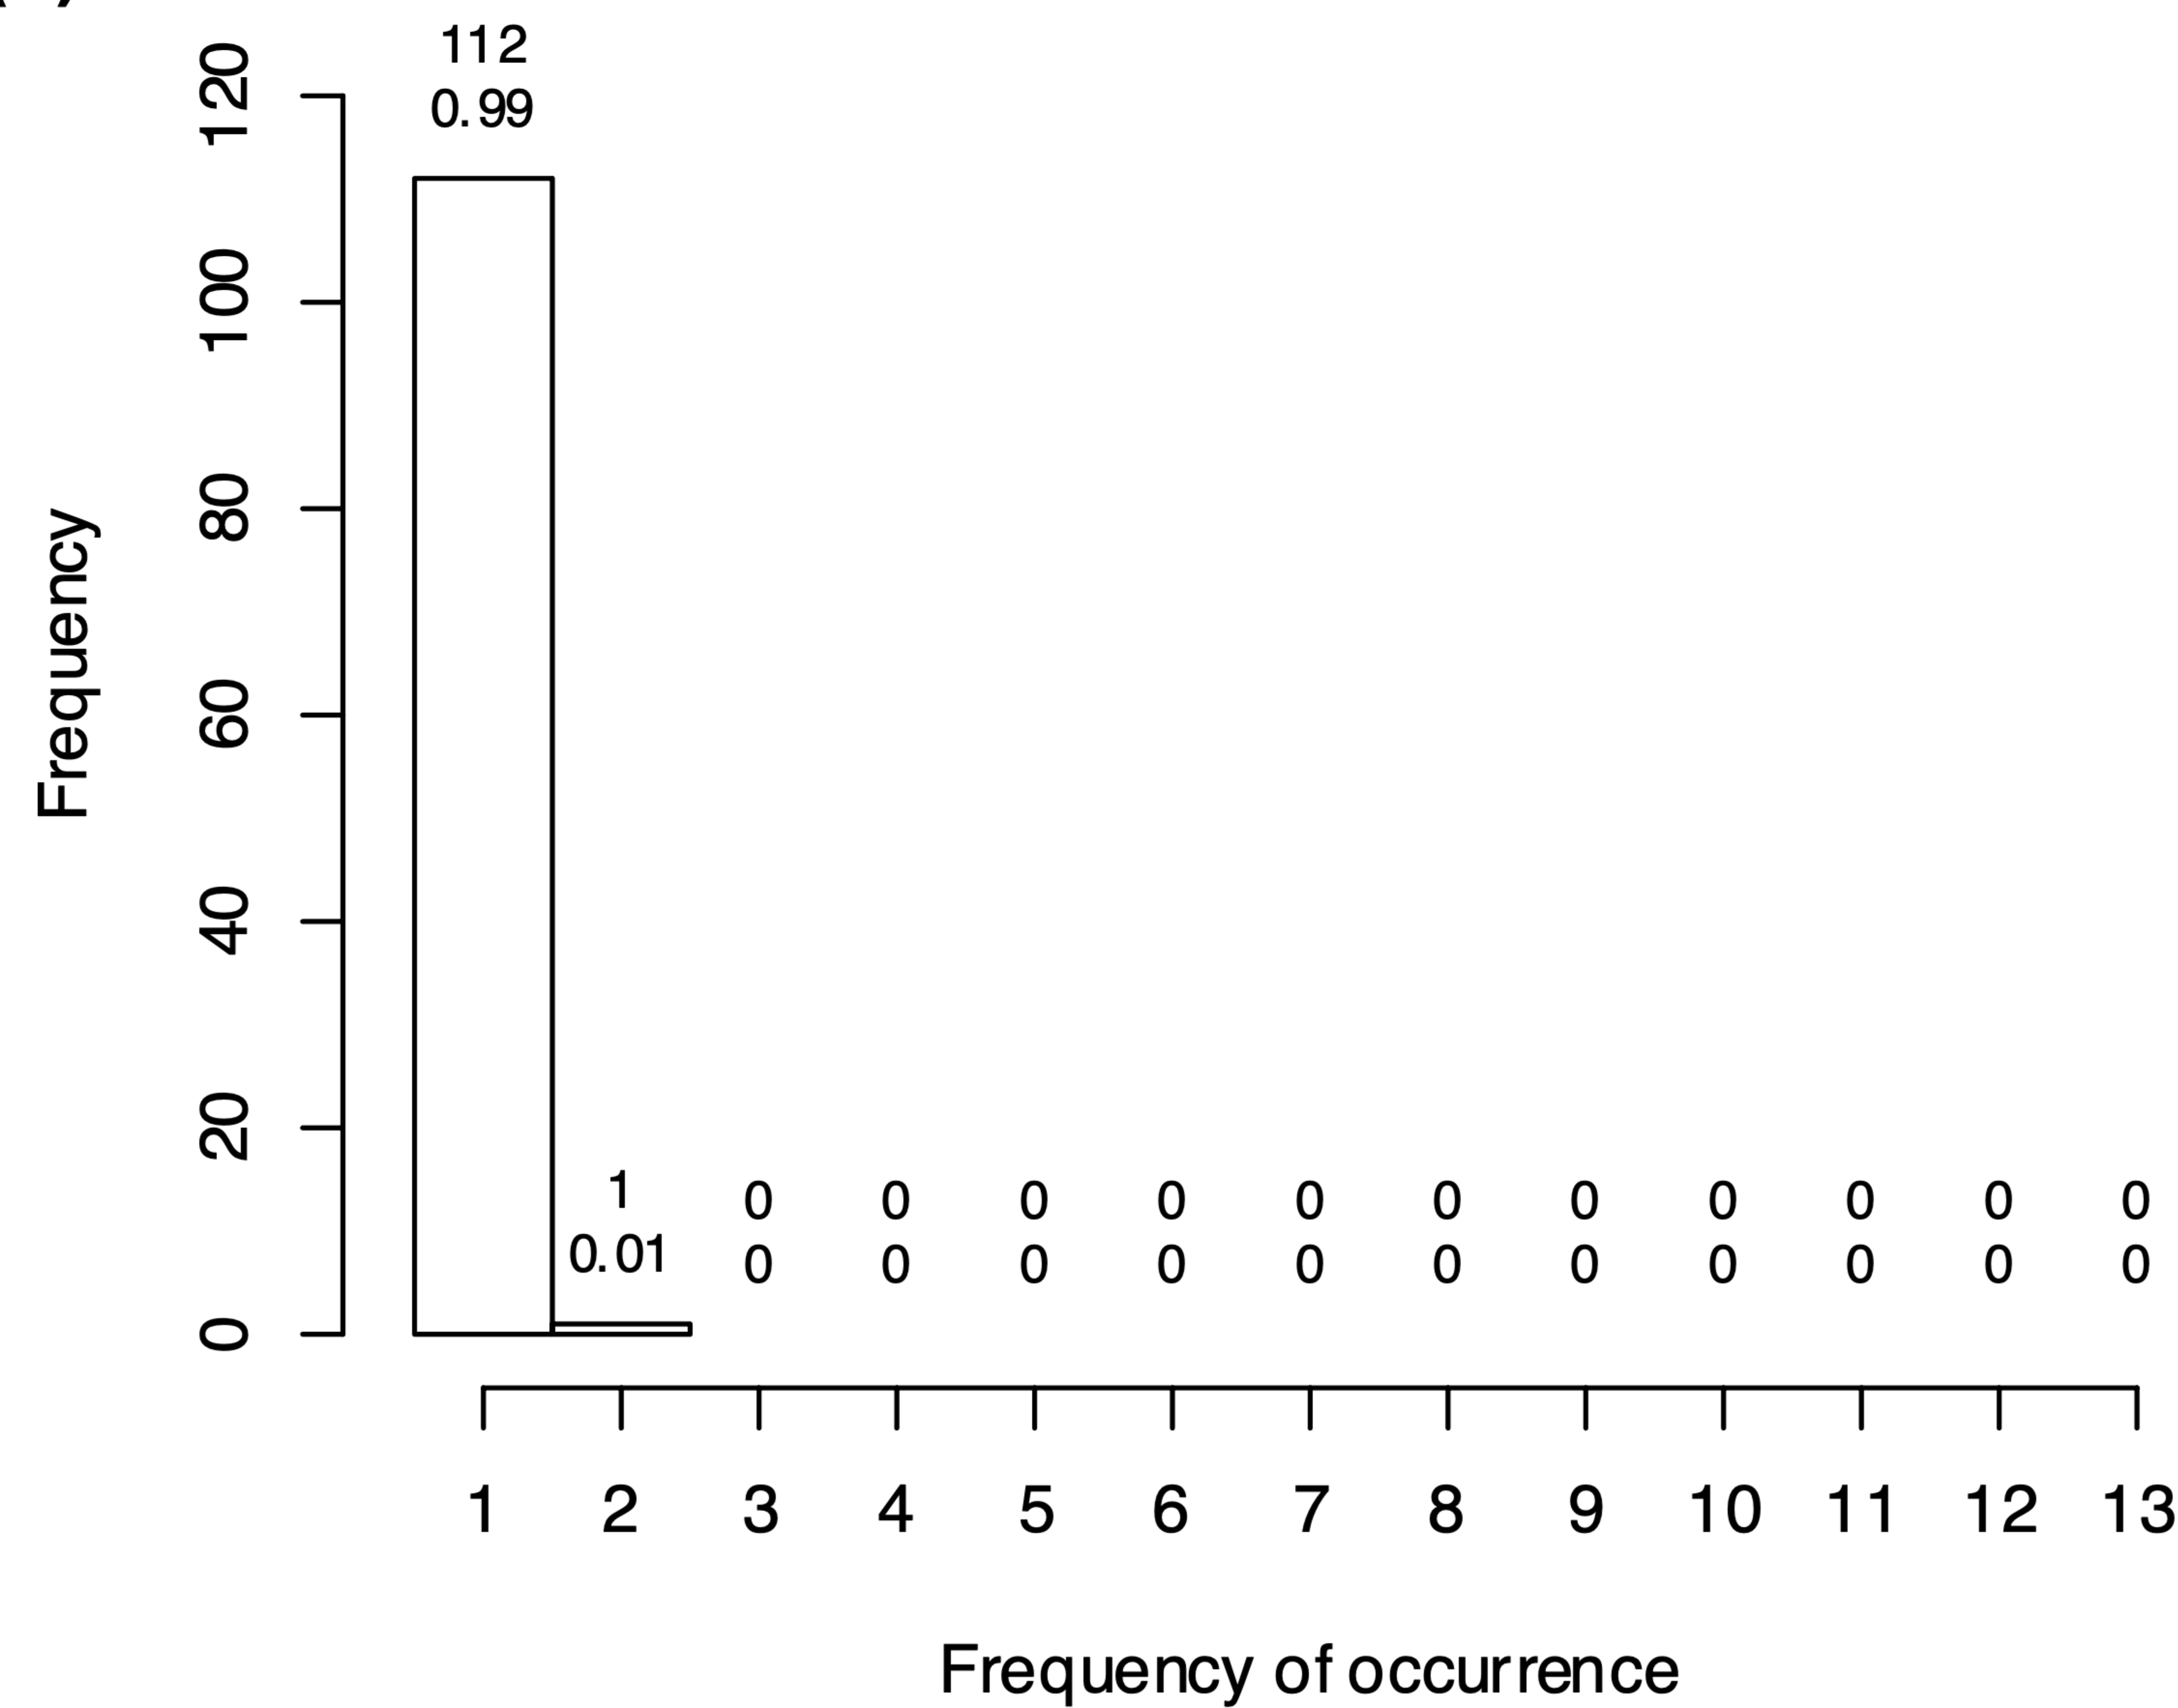**(d)**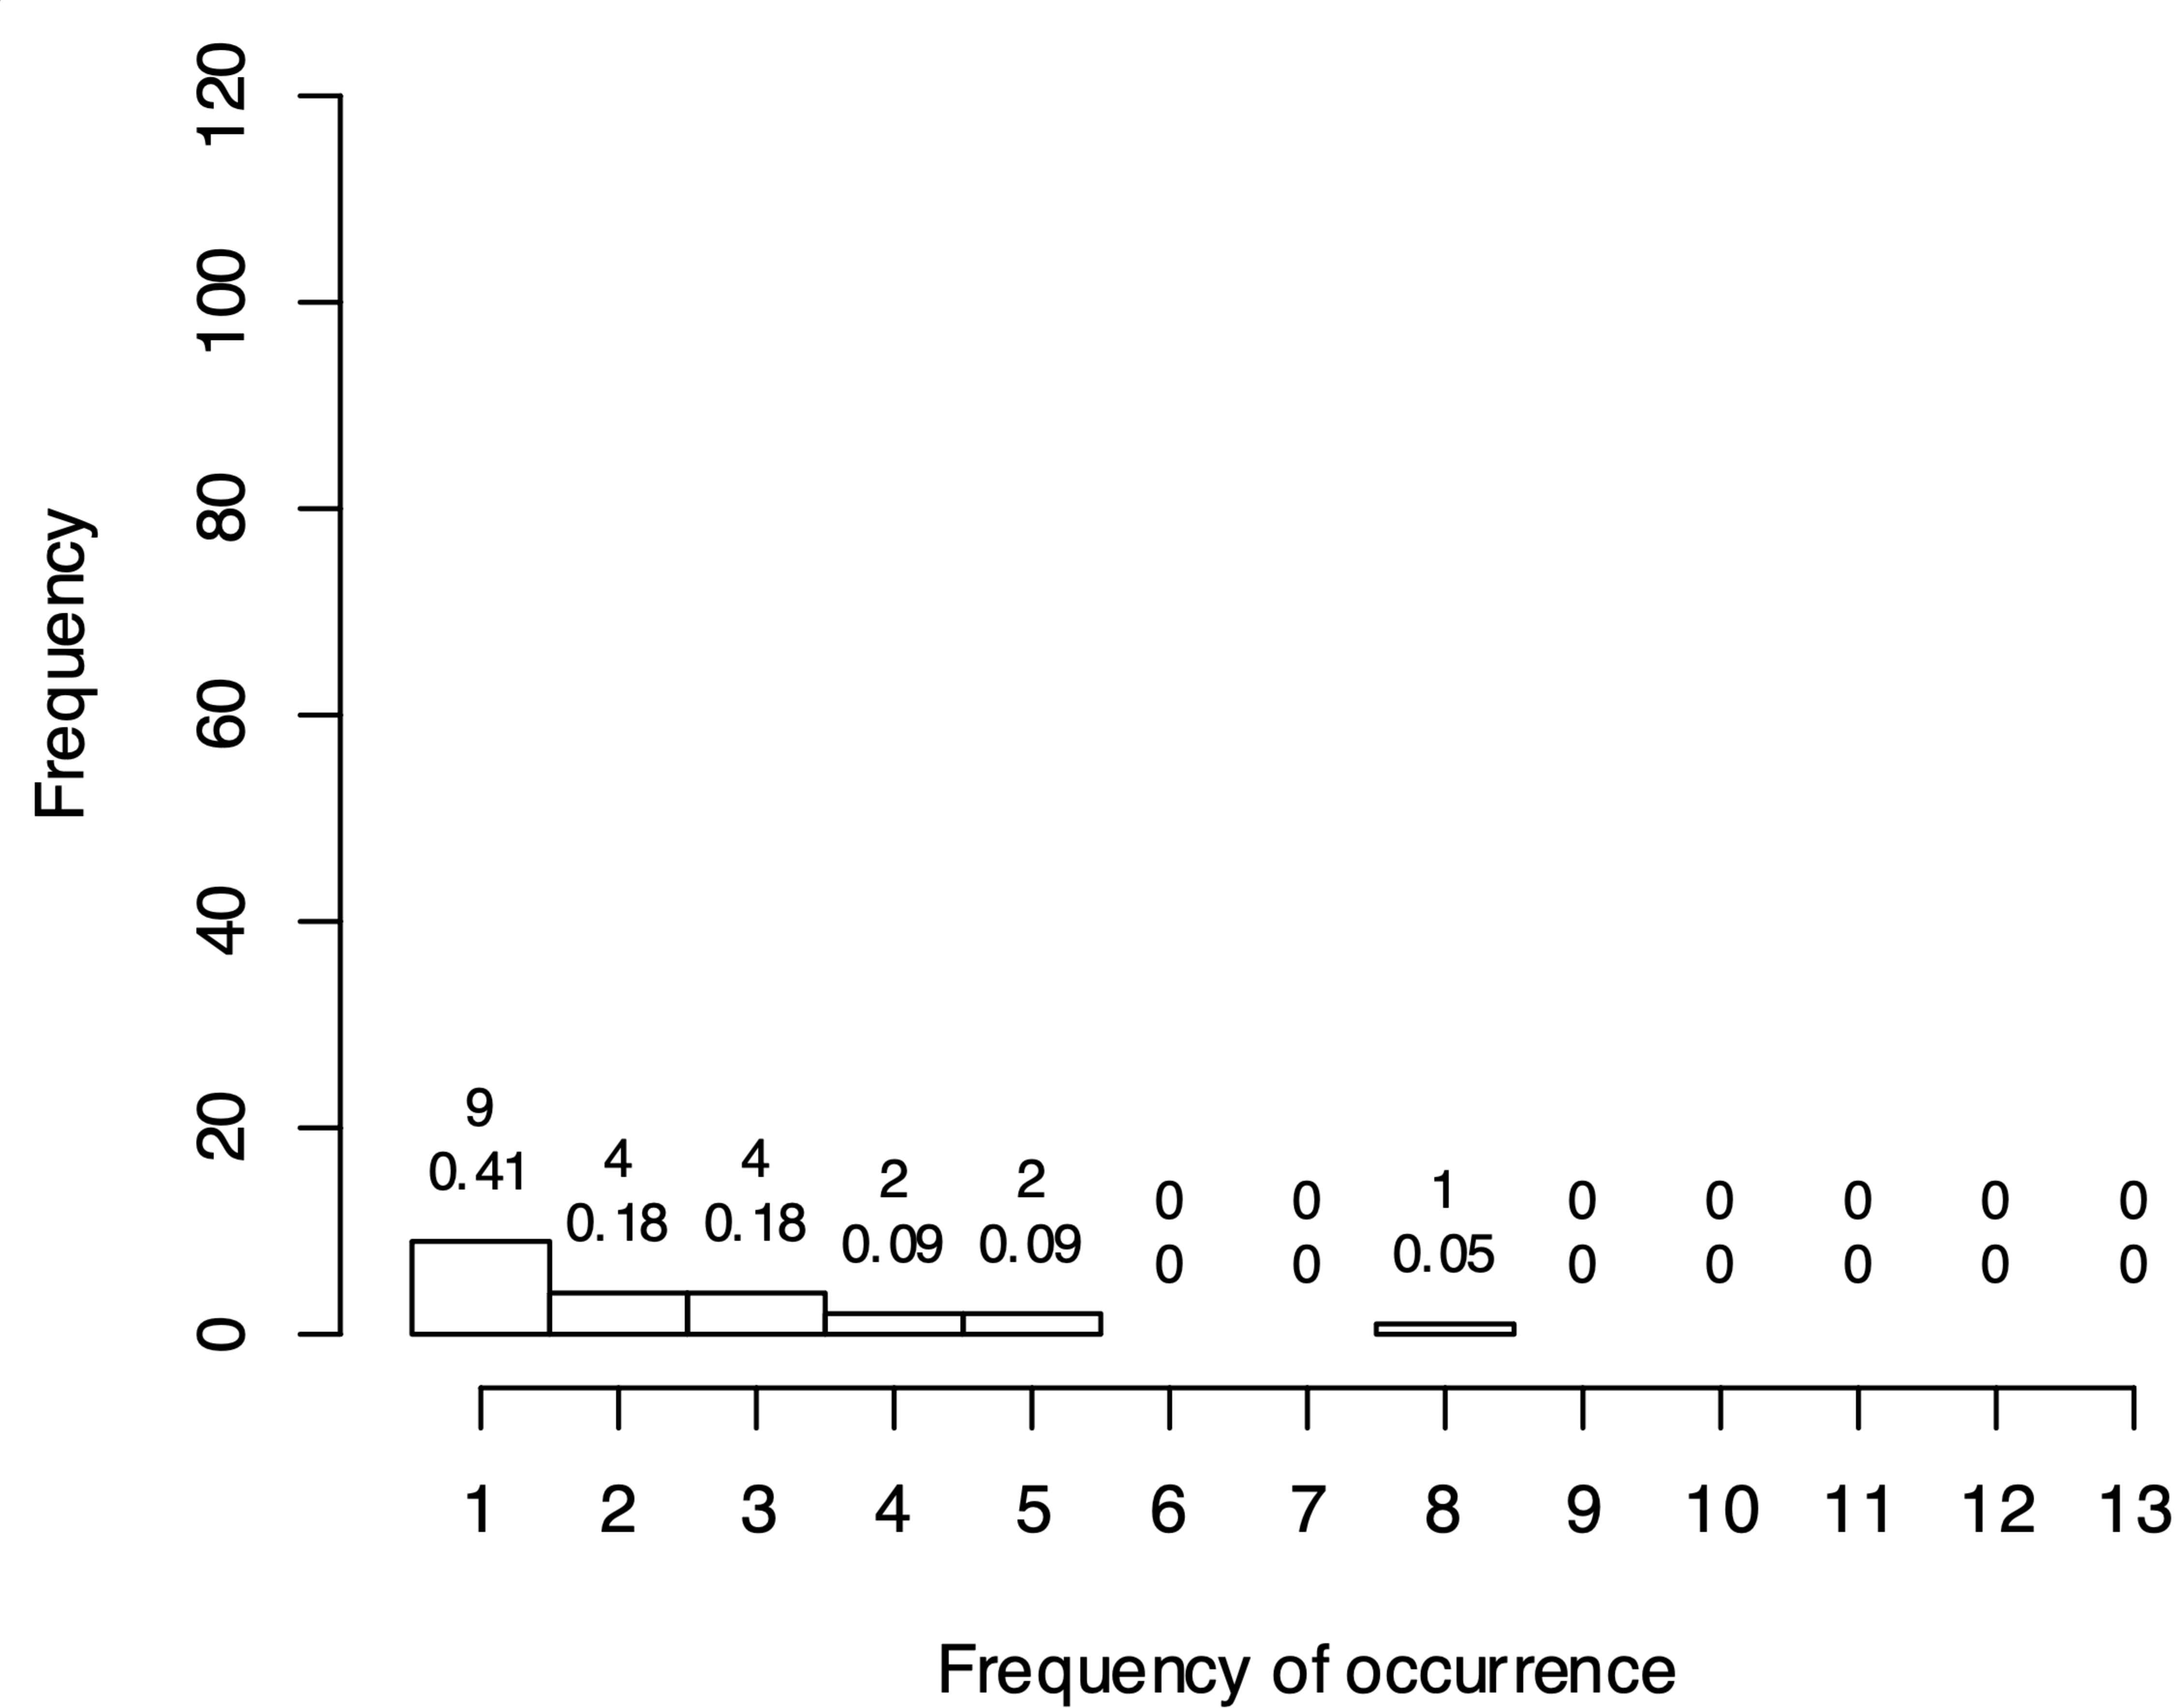

Supplement: mBio.03509-20-sf004.pdf [file mBio.03509-20-sf004.pdf]
